# Supplementary figures and images for: A compartmentalized signaling network mediates crossover control in meiosis
Source: eLife journal article supplement (doi:10.7554/elife.30789), 2018-03-09

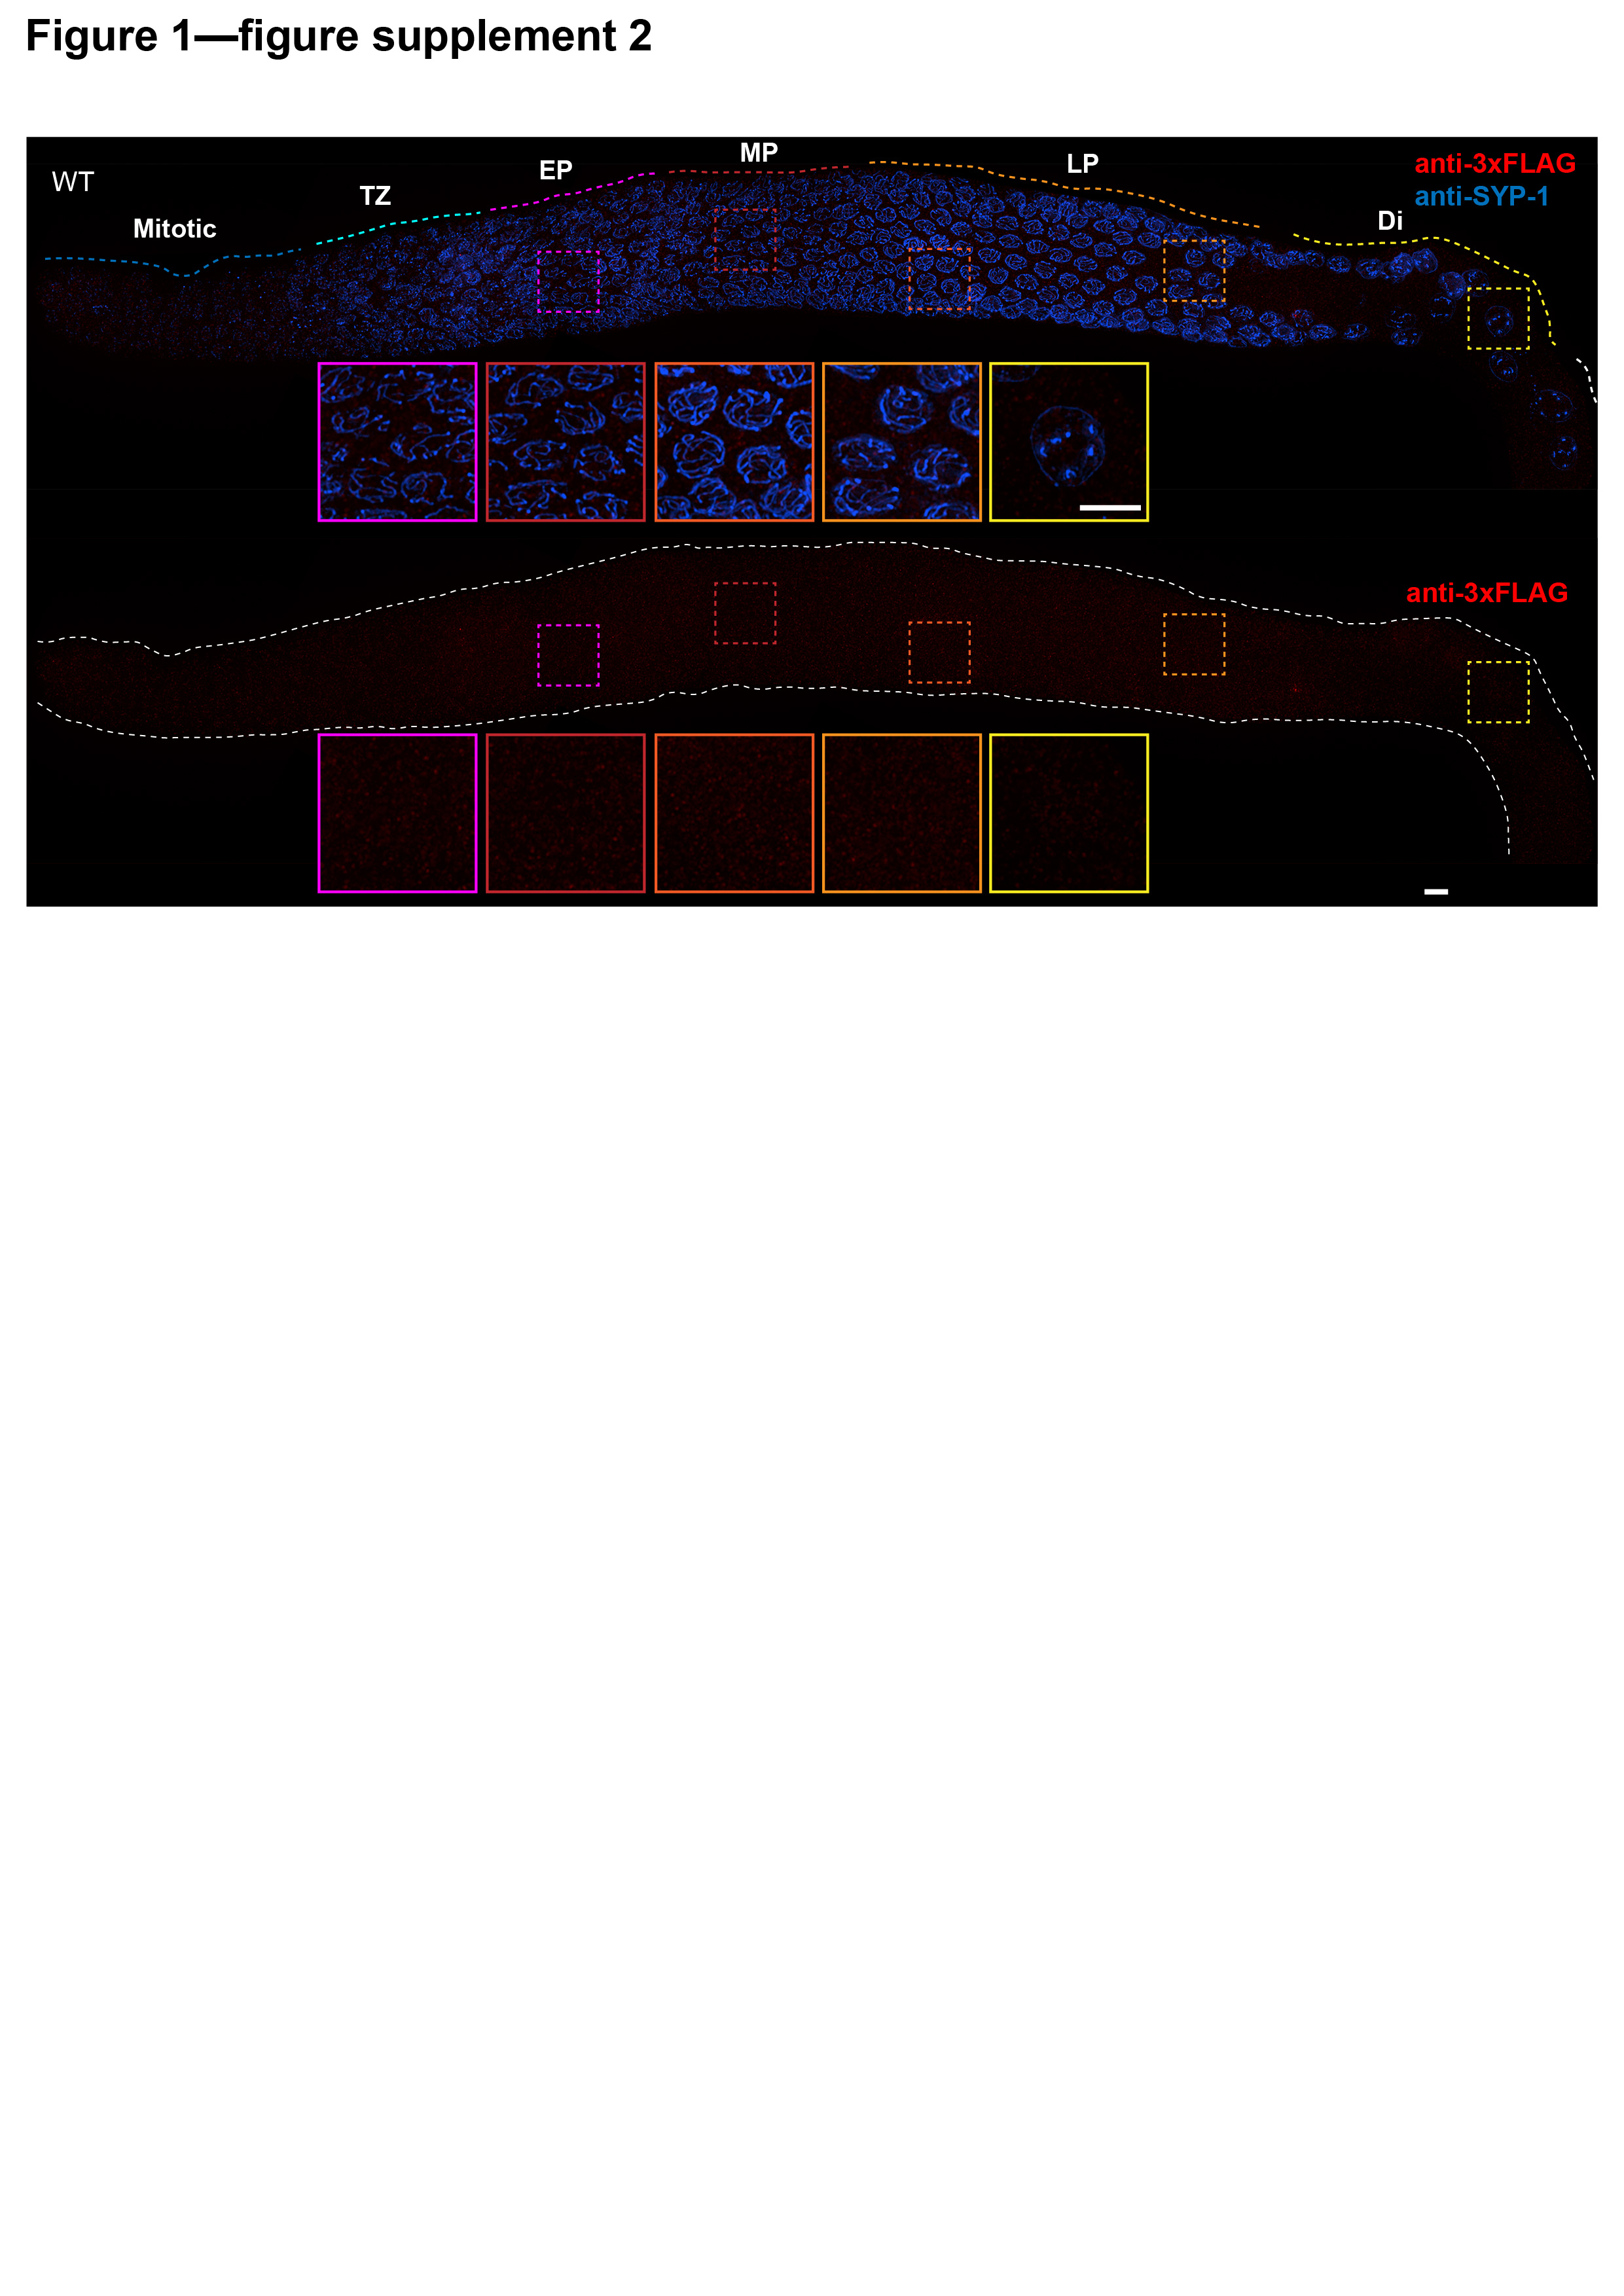

Supplement: supp [file elife-30789-supp-v1.zip › elife_poa_e30789_Figure_1_figure_supplement_2.jpg]

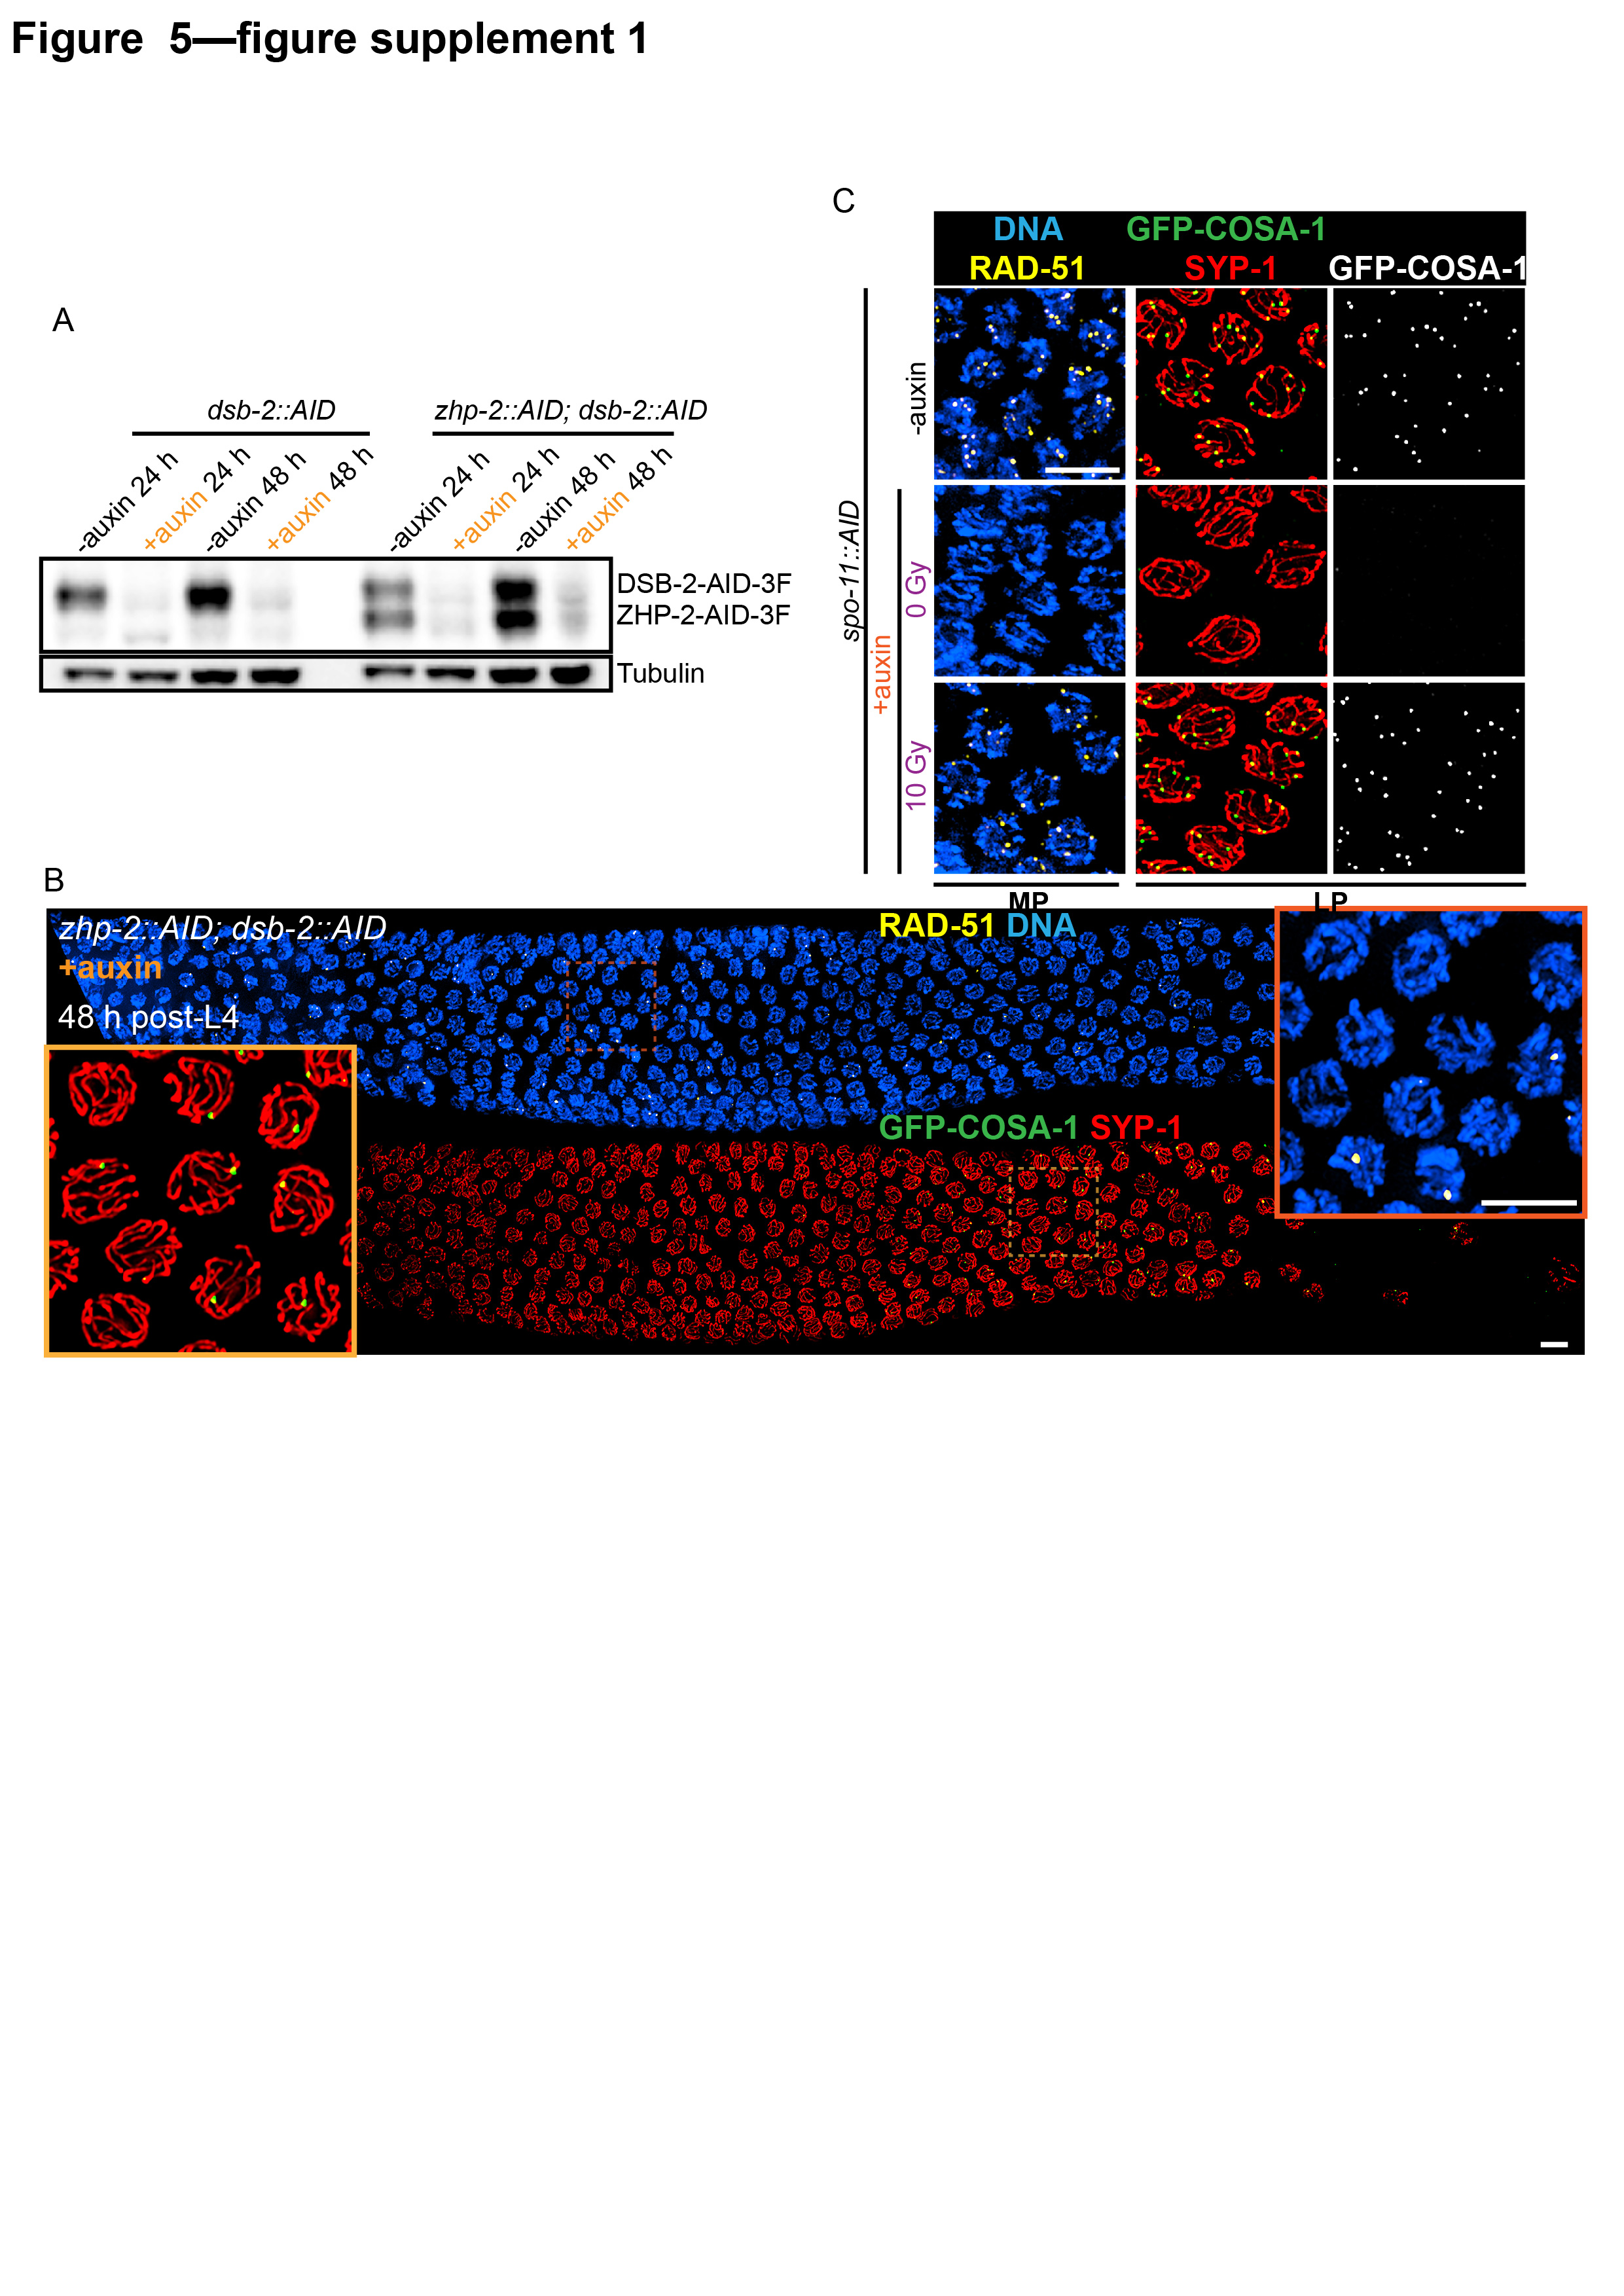

Supplement: supp [file elife-30789-supp-v1.zip › elife_poa_e30789_Figure_5_figure_supplement_1.jpg]

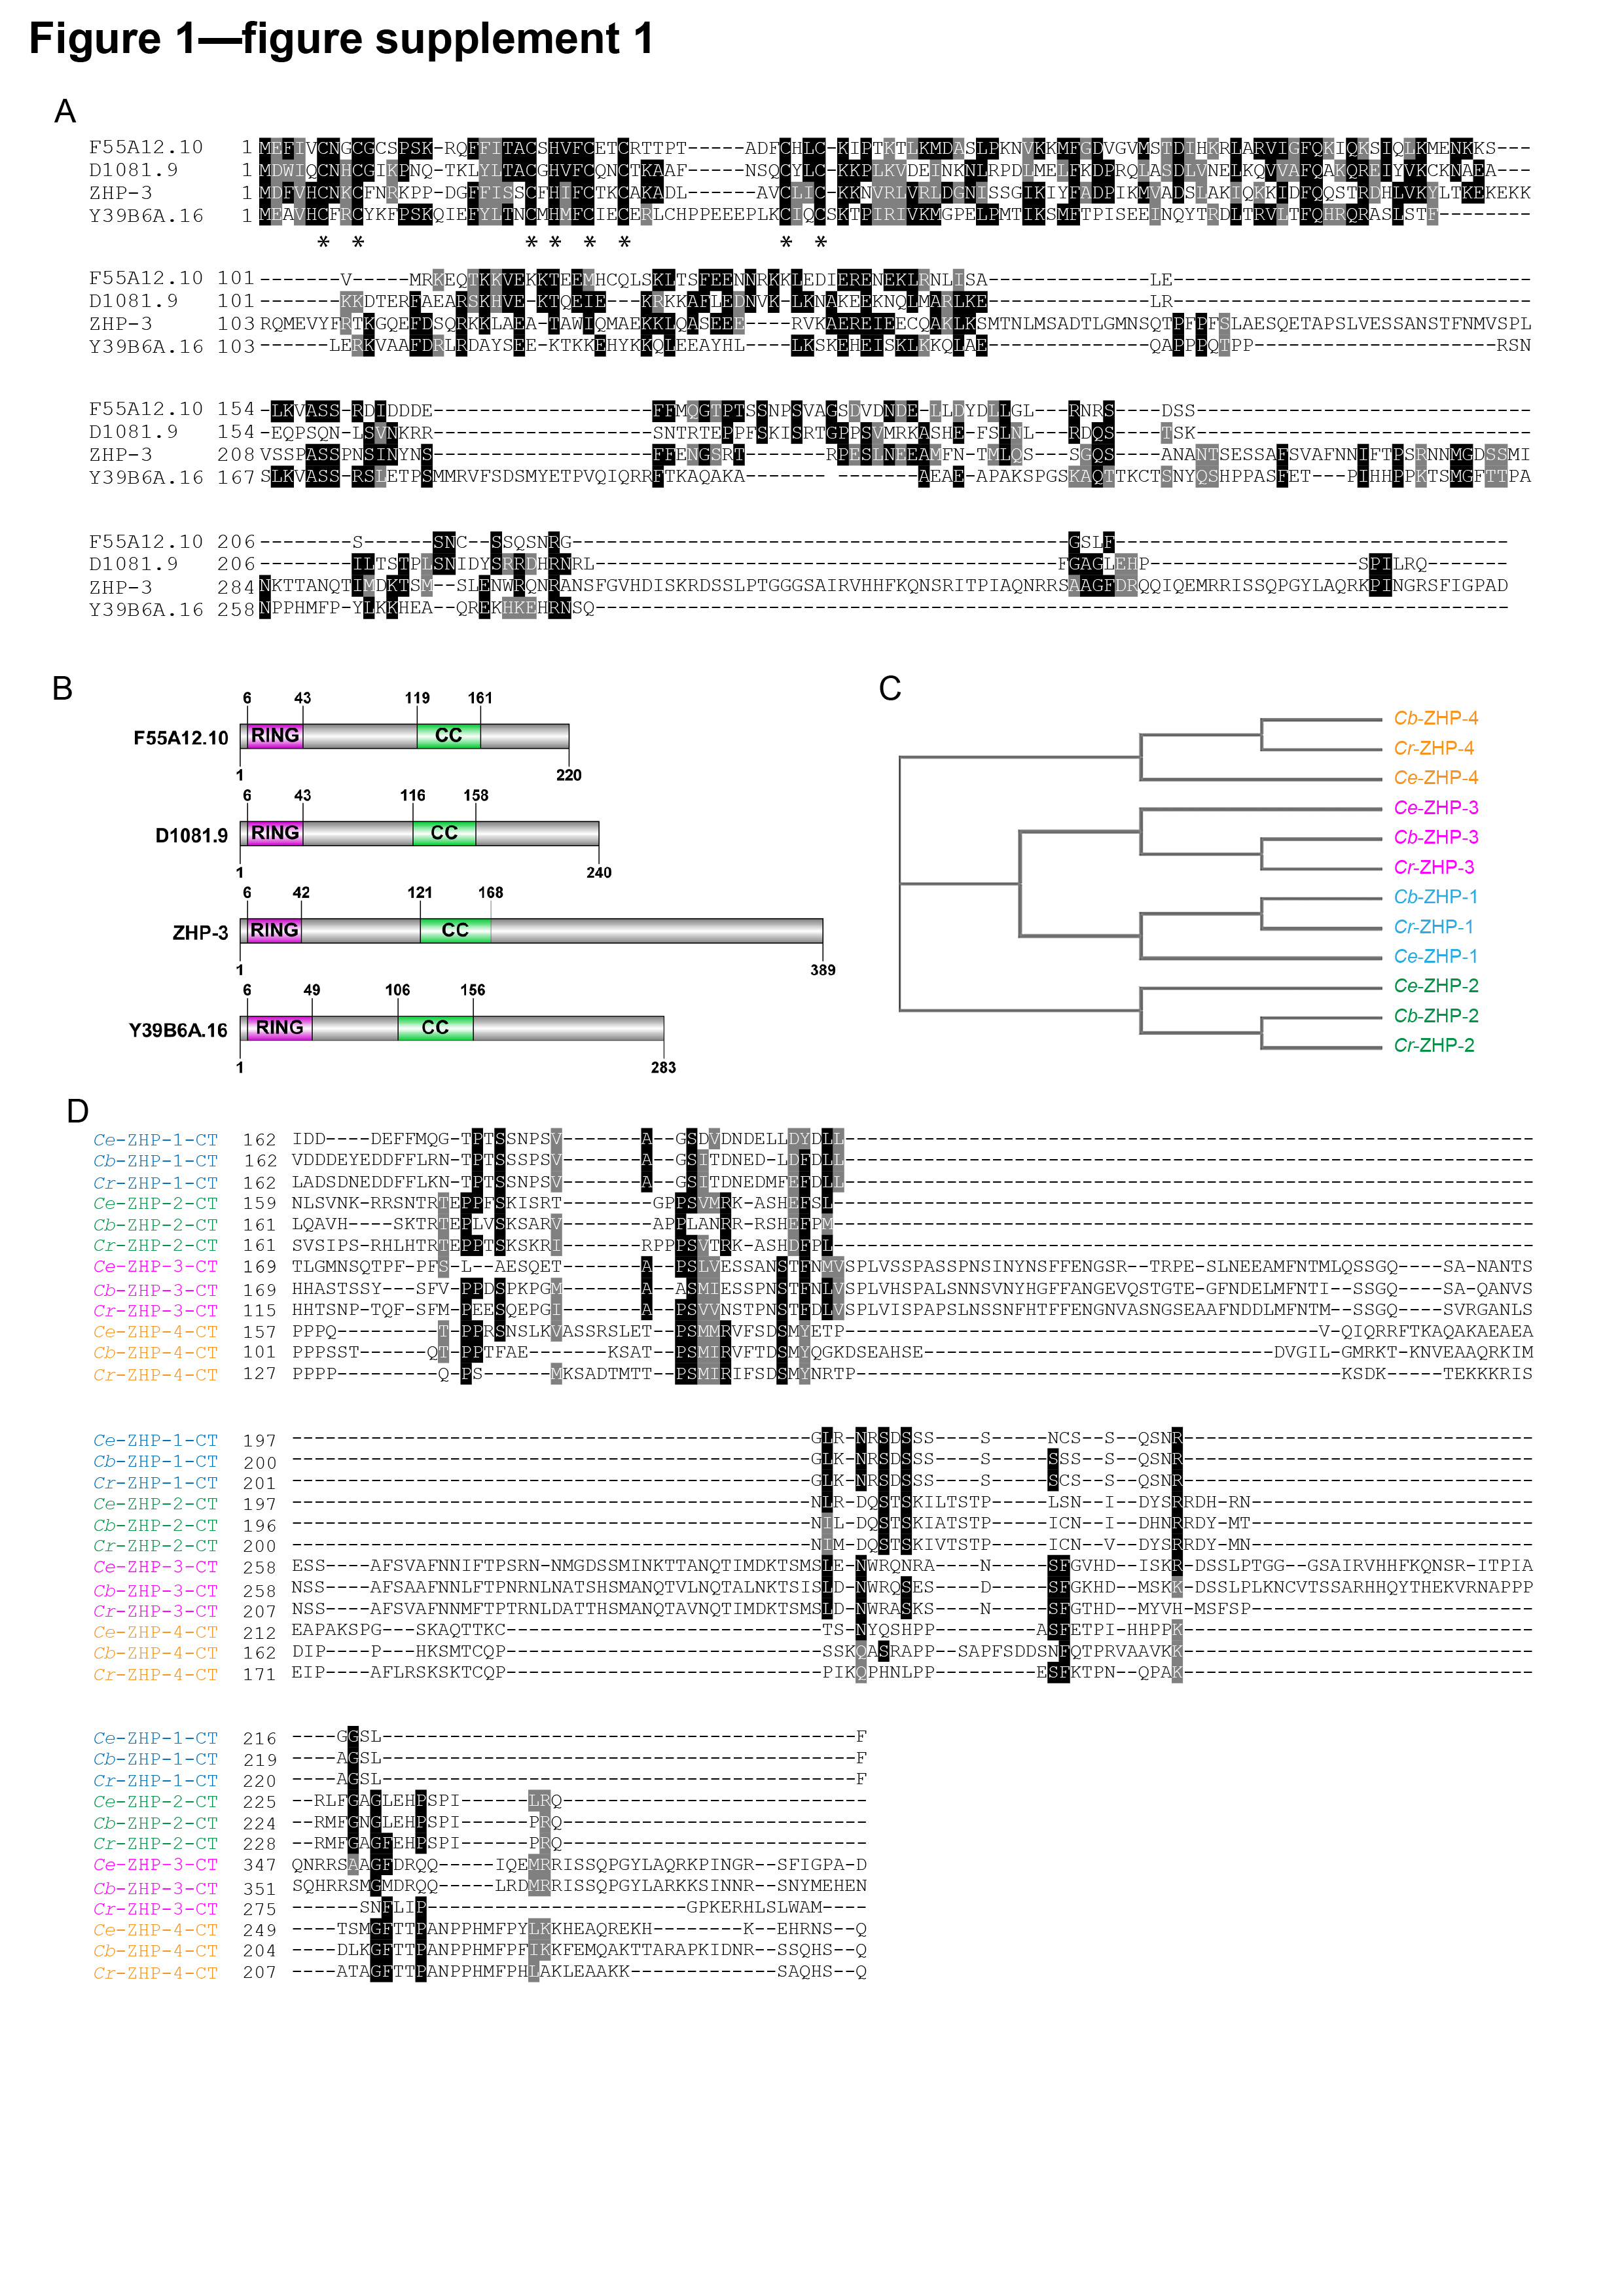

Supplement: supp [file elife-30789-supp-v1.zip › elife_poa_e30789_Figure_1_figure_supplement_1.jpg]

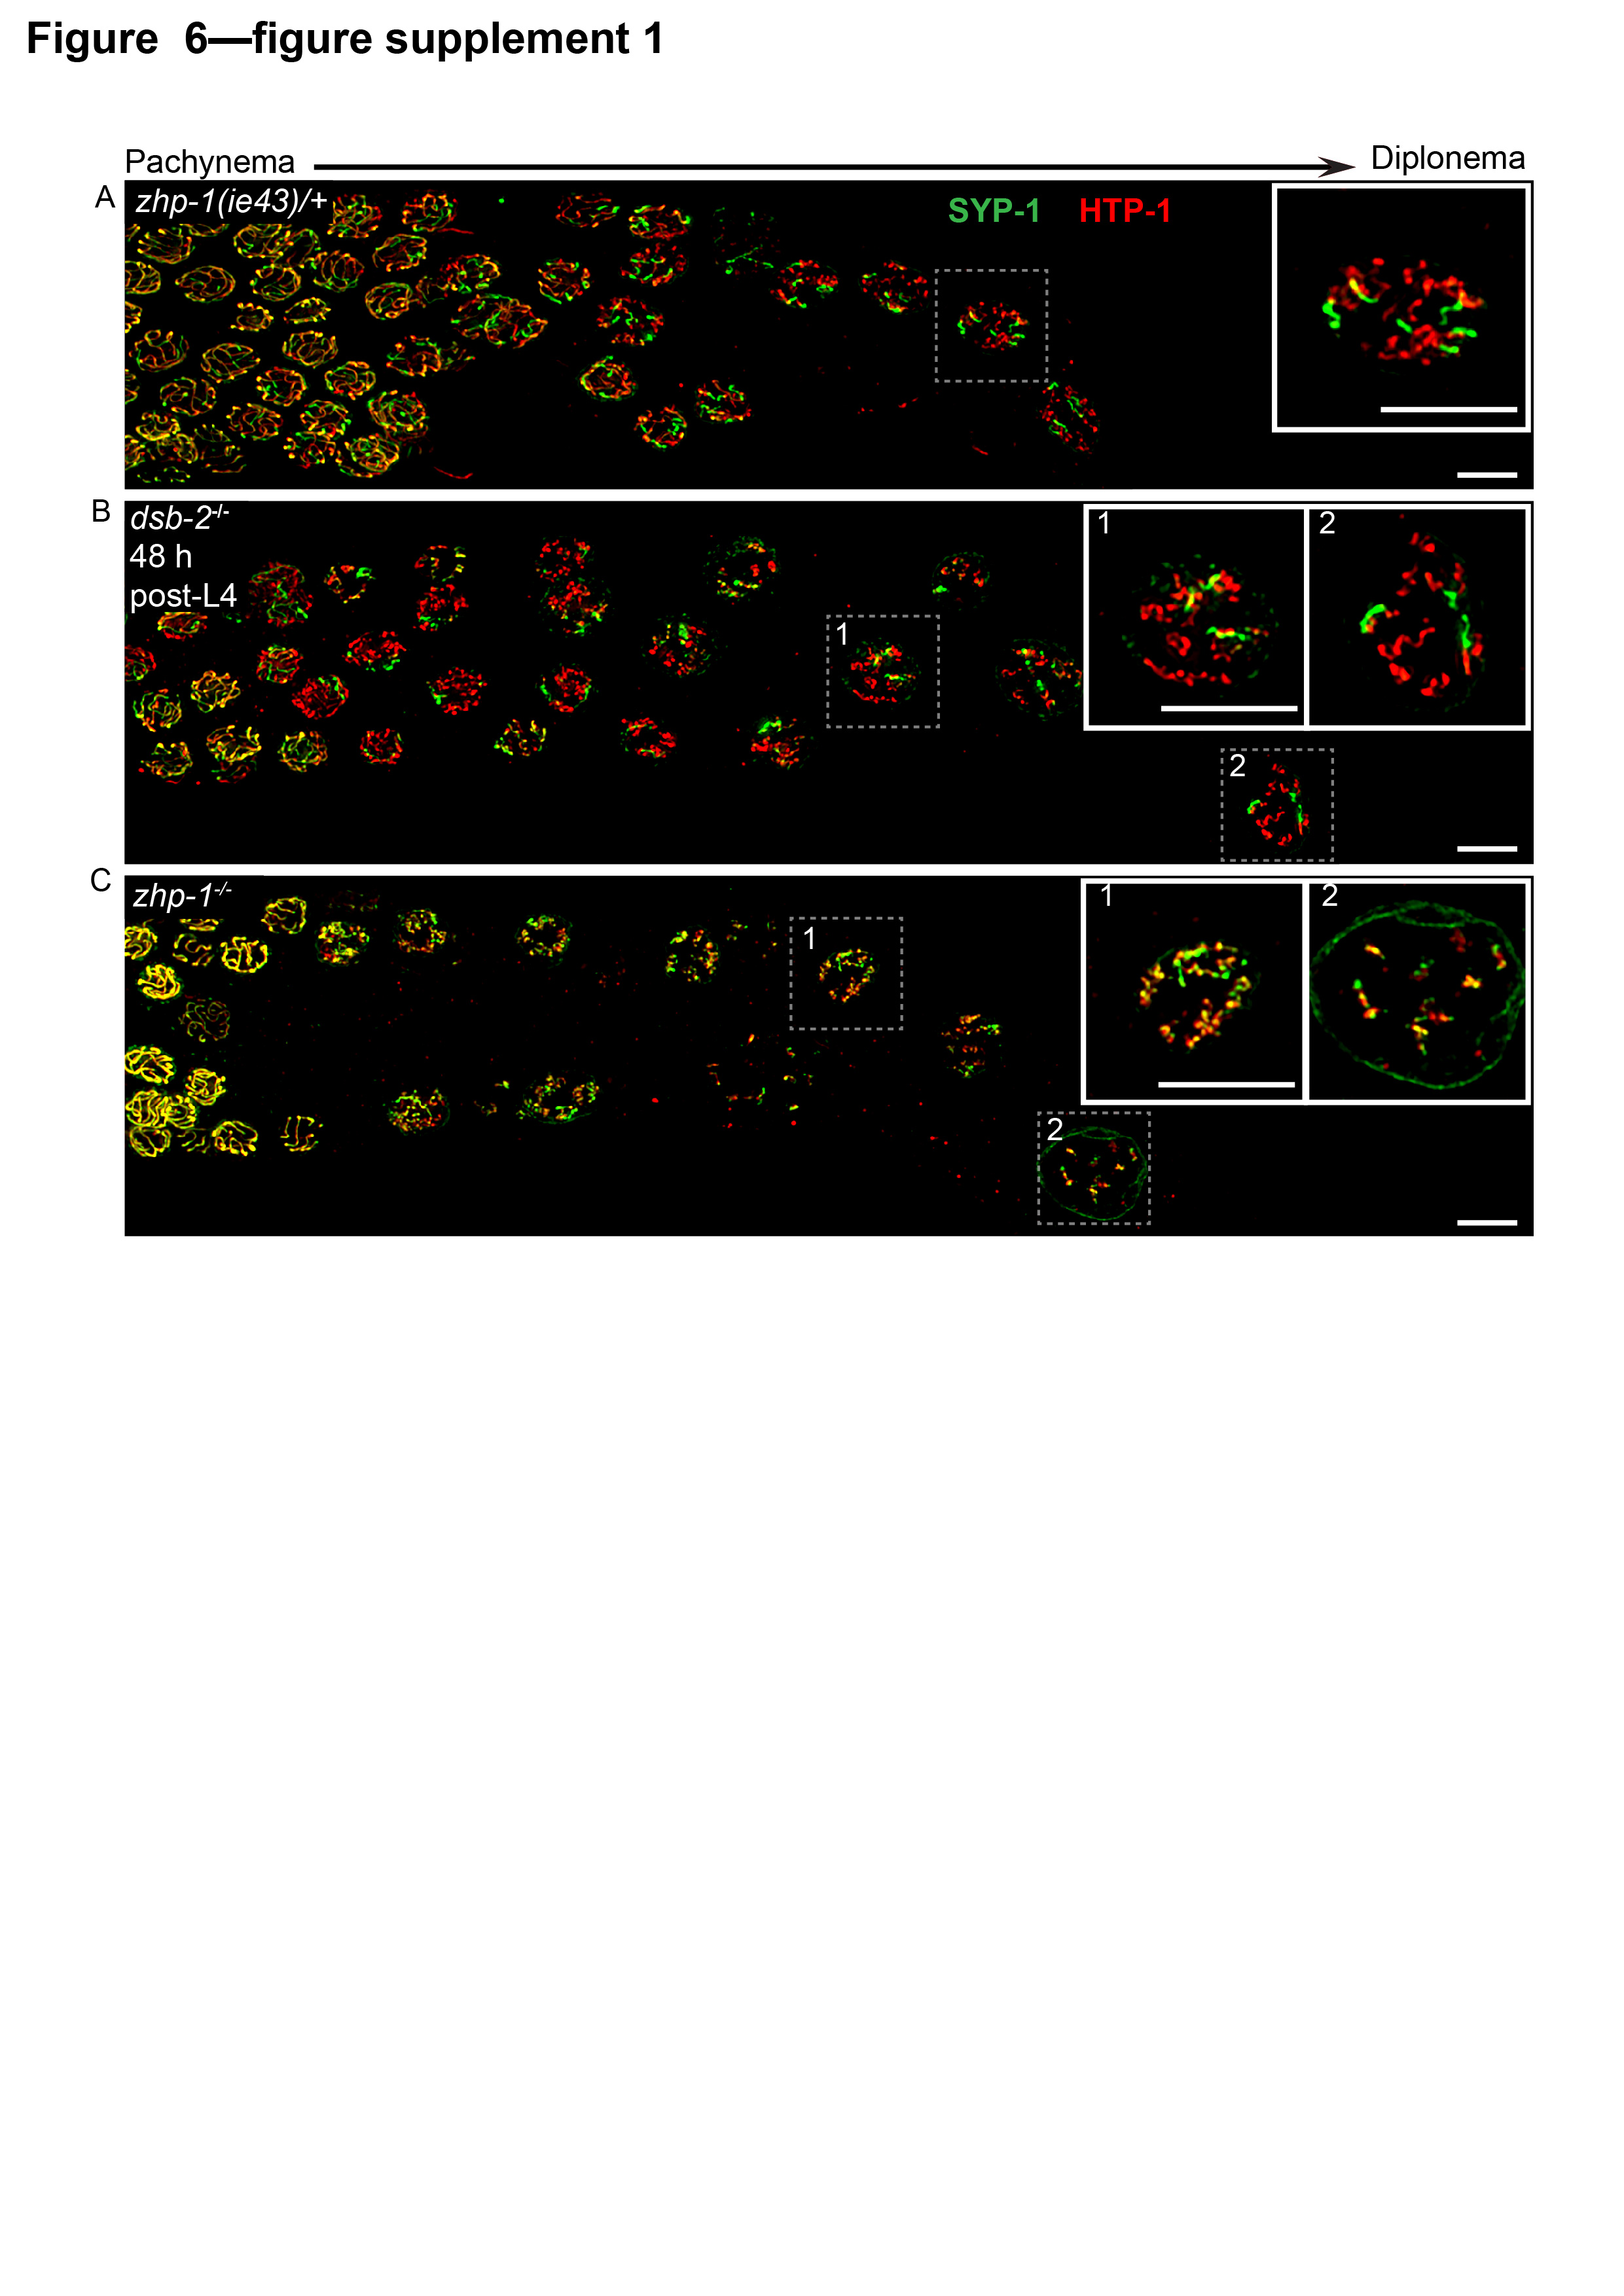

Supplement: supp [file elife-30789-supp-v1.zip › elife_poa_e30789_Figure_6_figure_supplement_1.jpg]

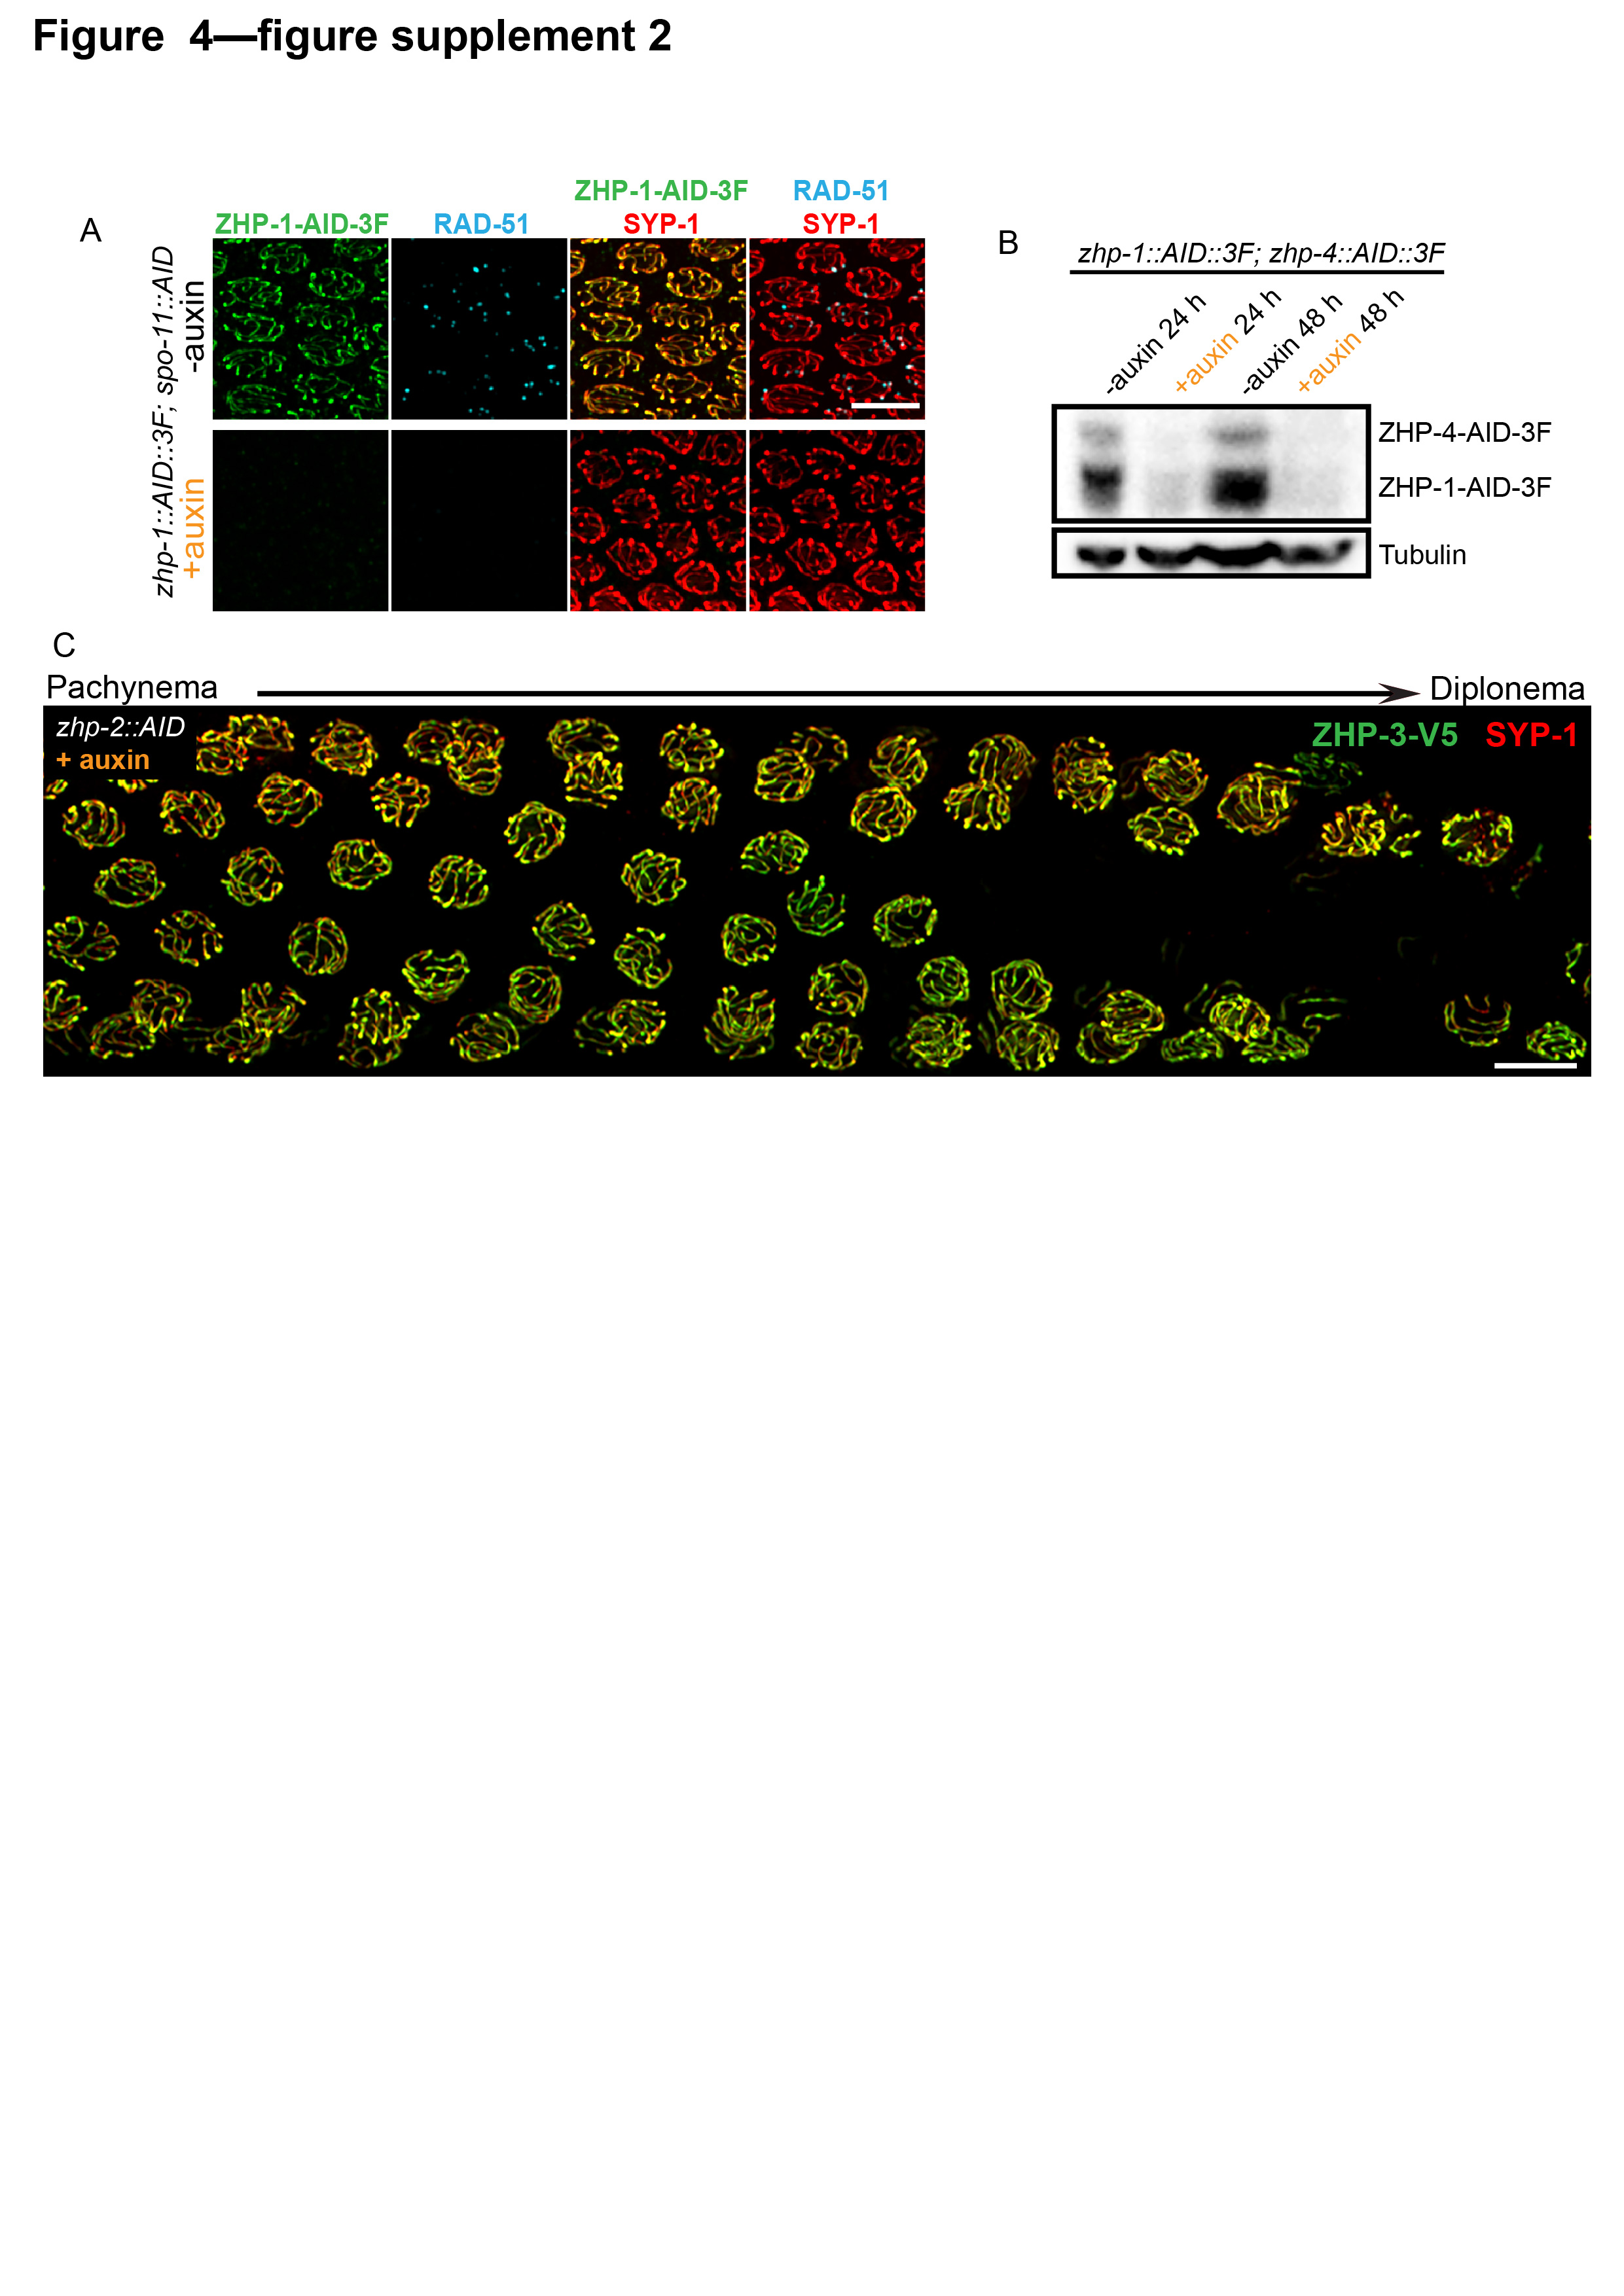

Supplement: supp [file elife-30789-supp-v1.zip › elife_poa_e30789_Figure_4_figure_supplement_2.jpg]

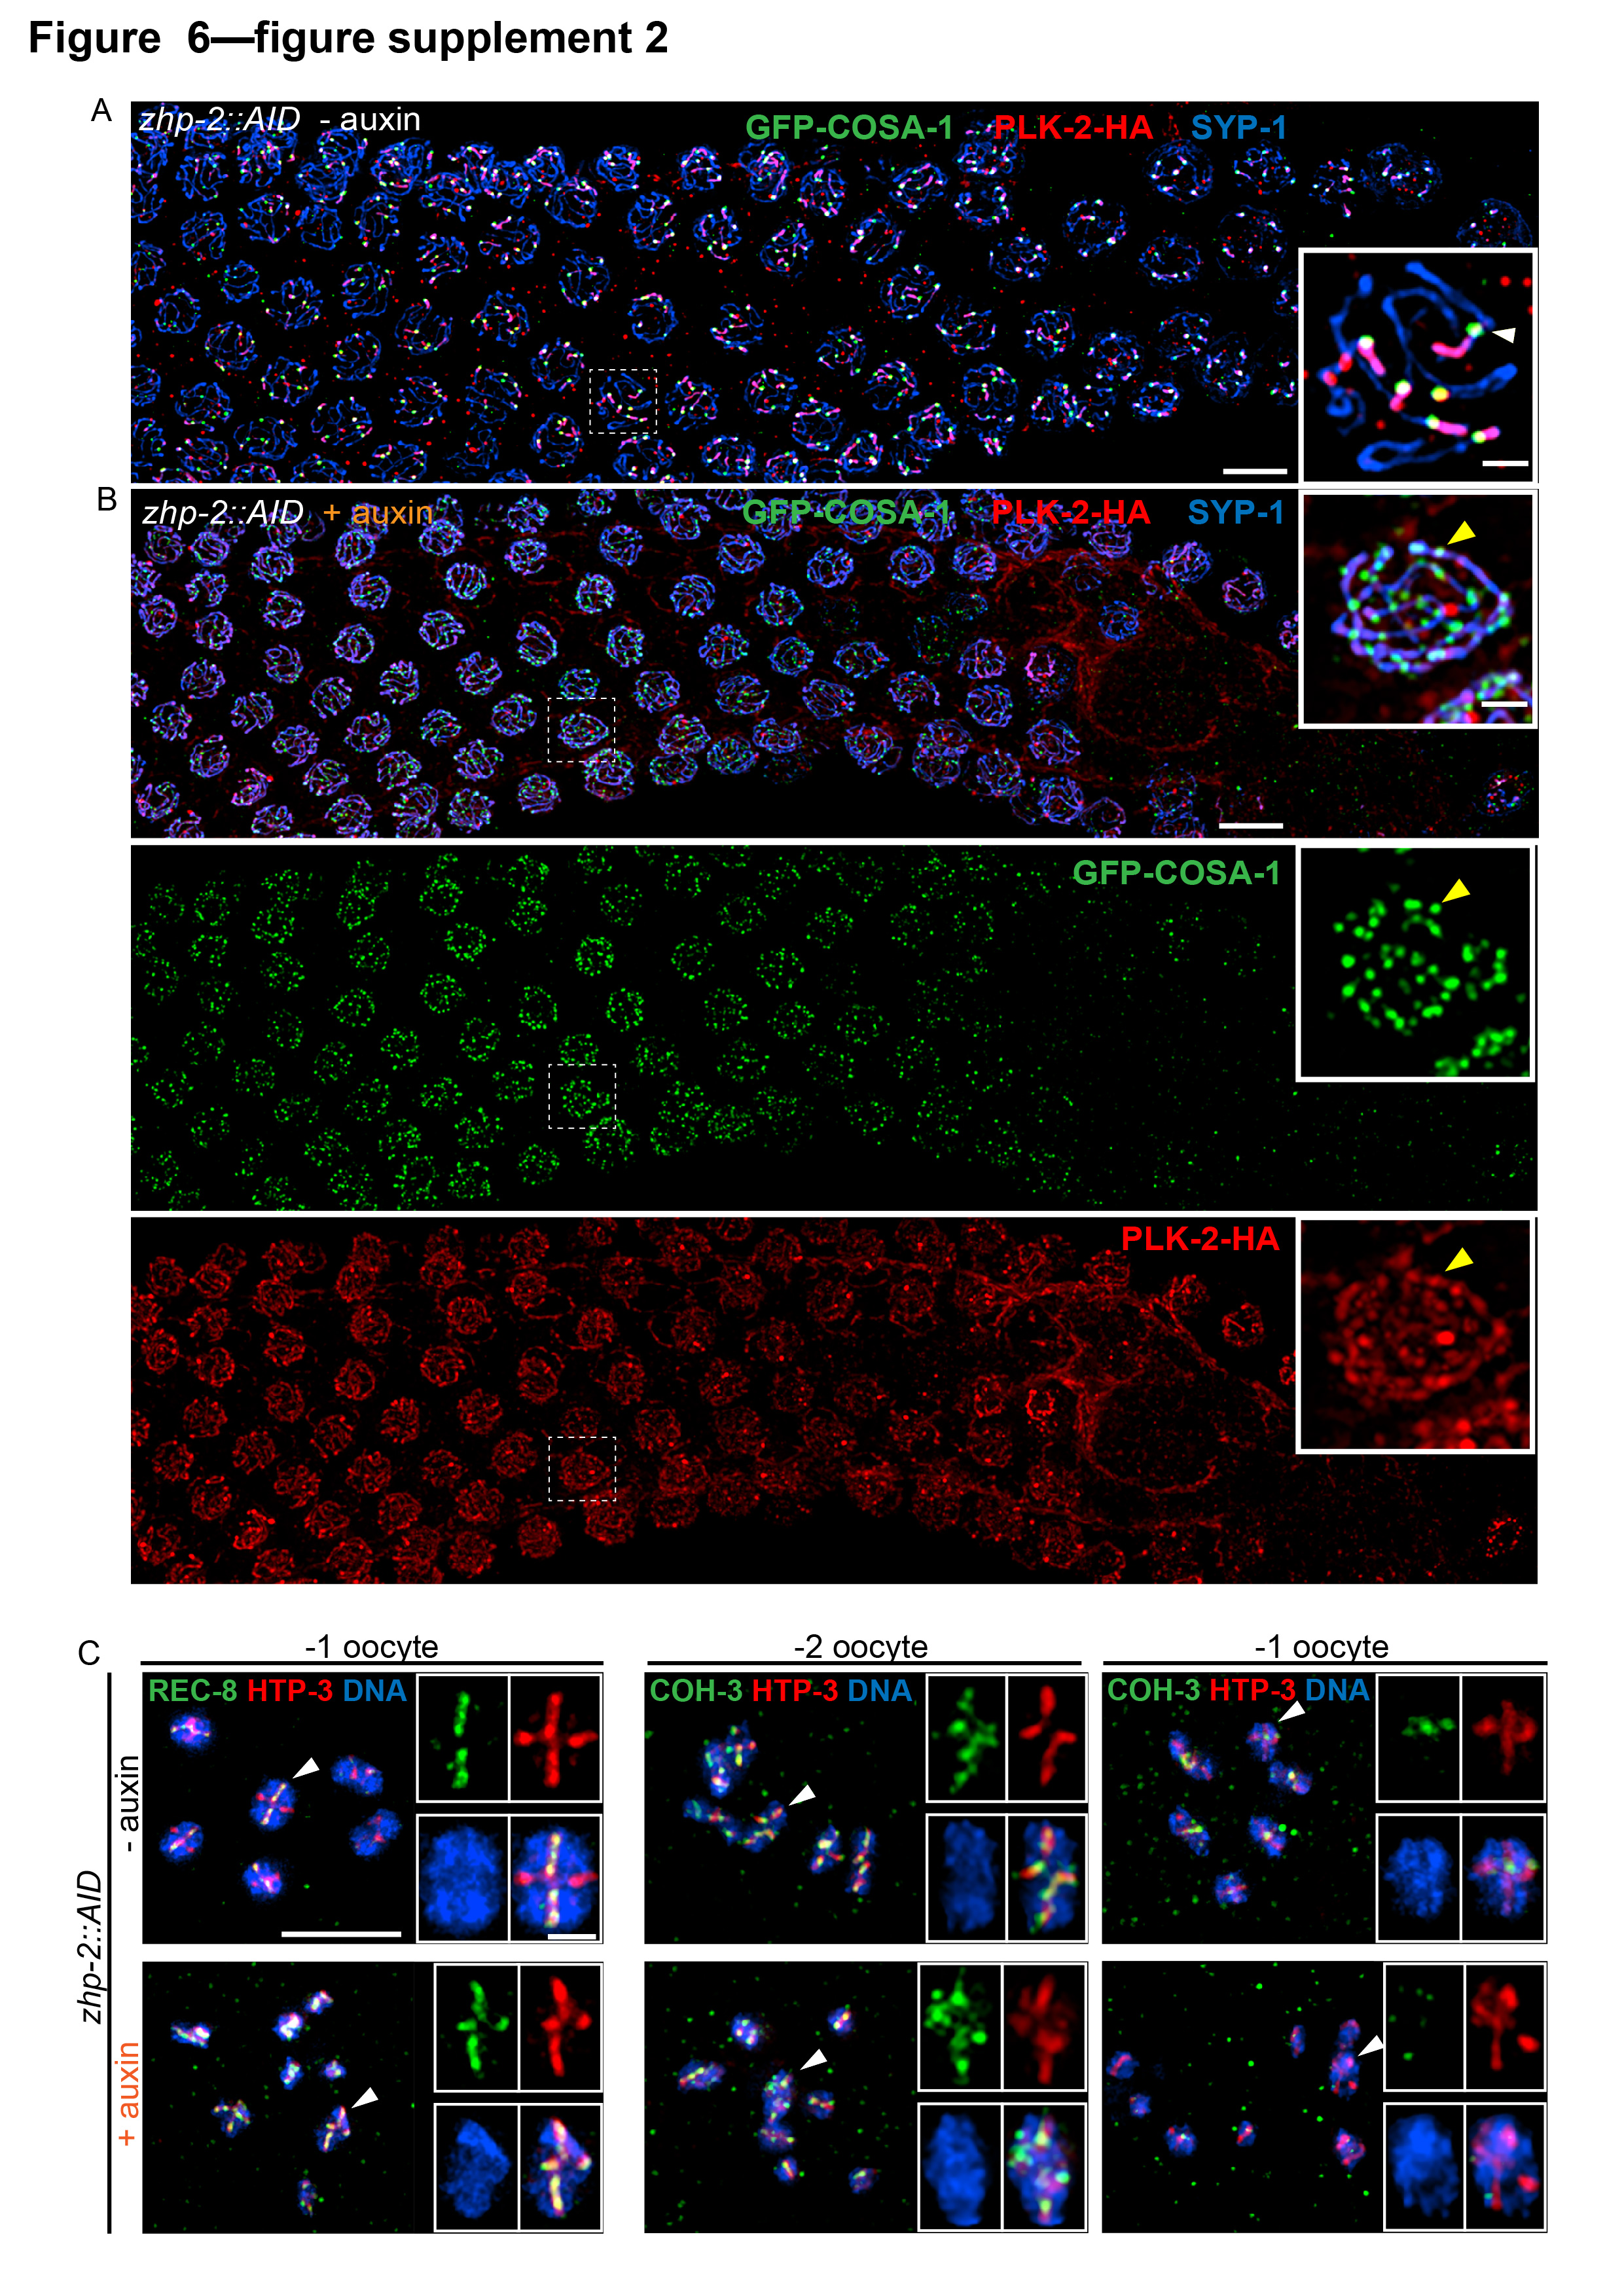

Supplement: supp [file elife-30789-supp-v1.zip › elife_poa_e30789_Figure_6_figure_supplement_2.jpg]

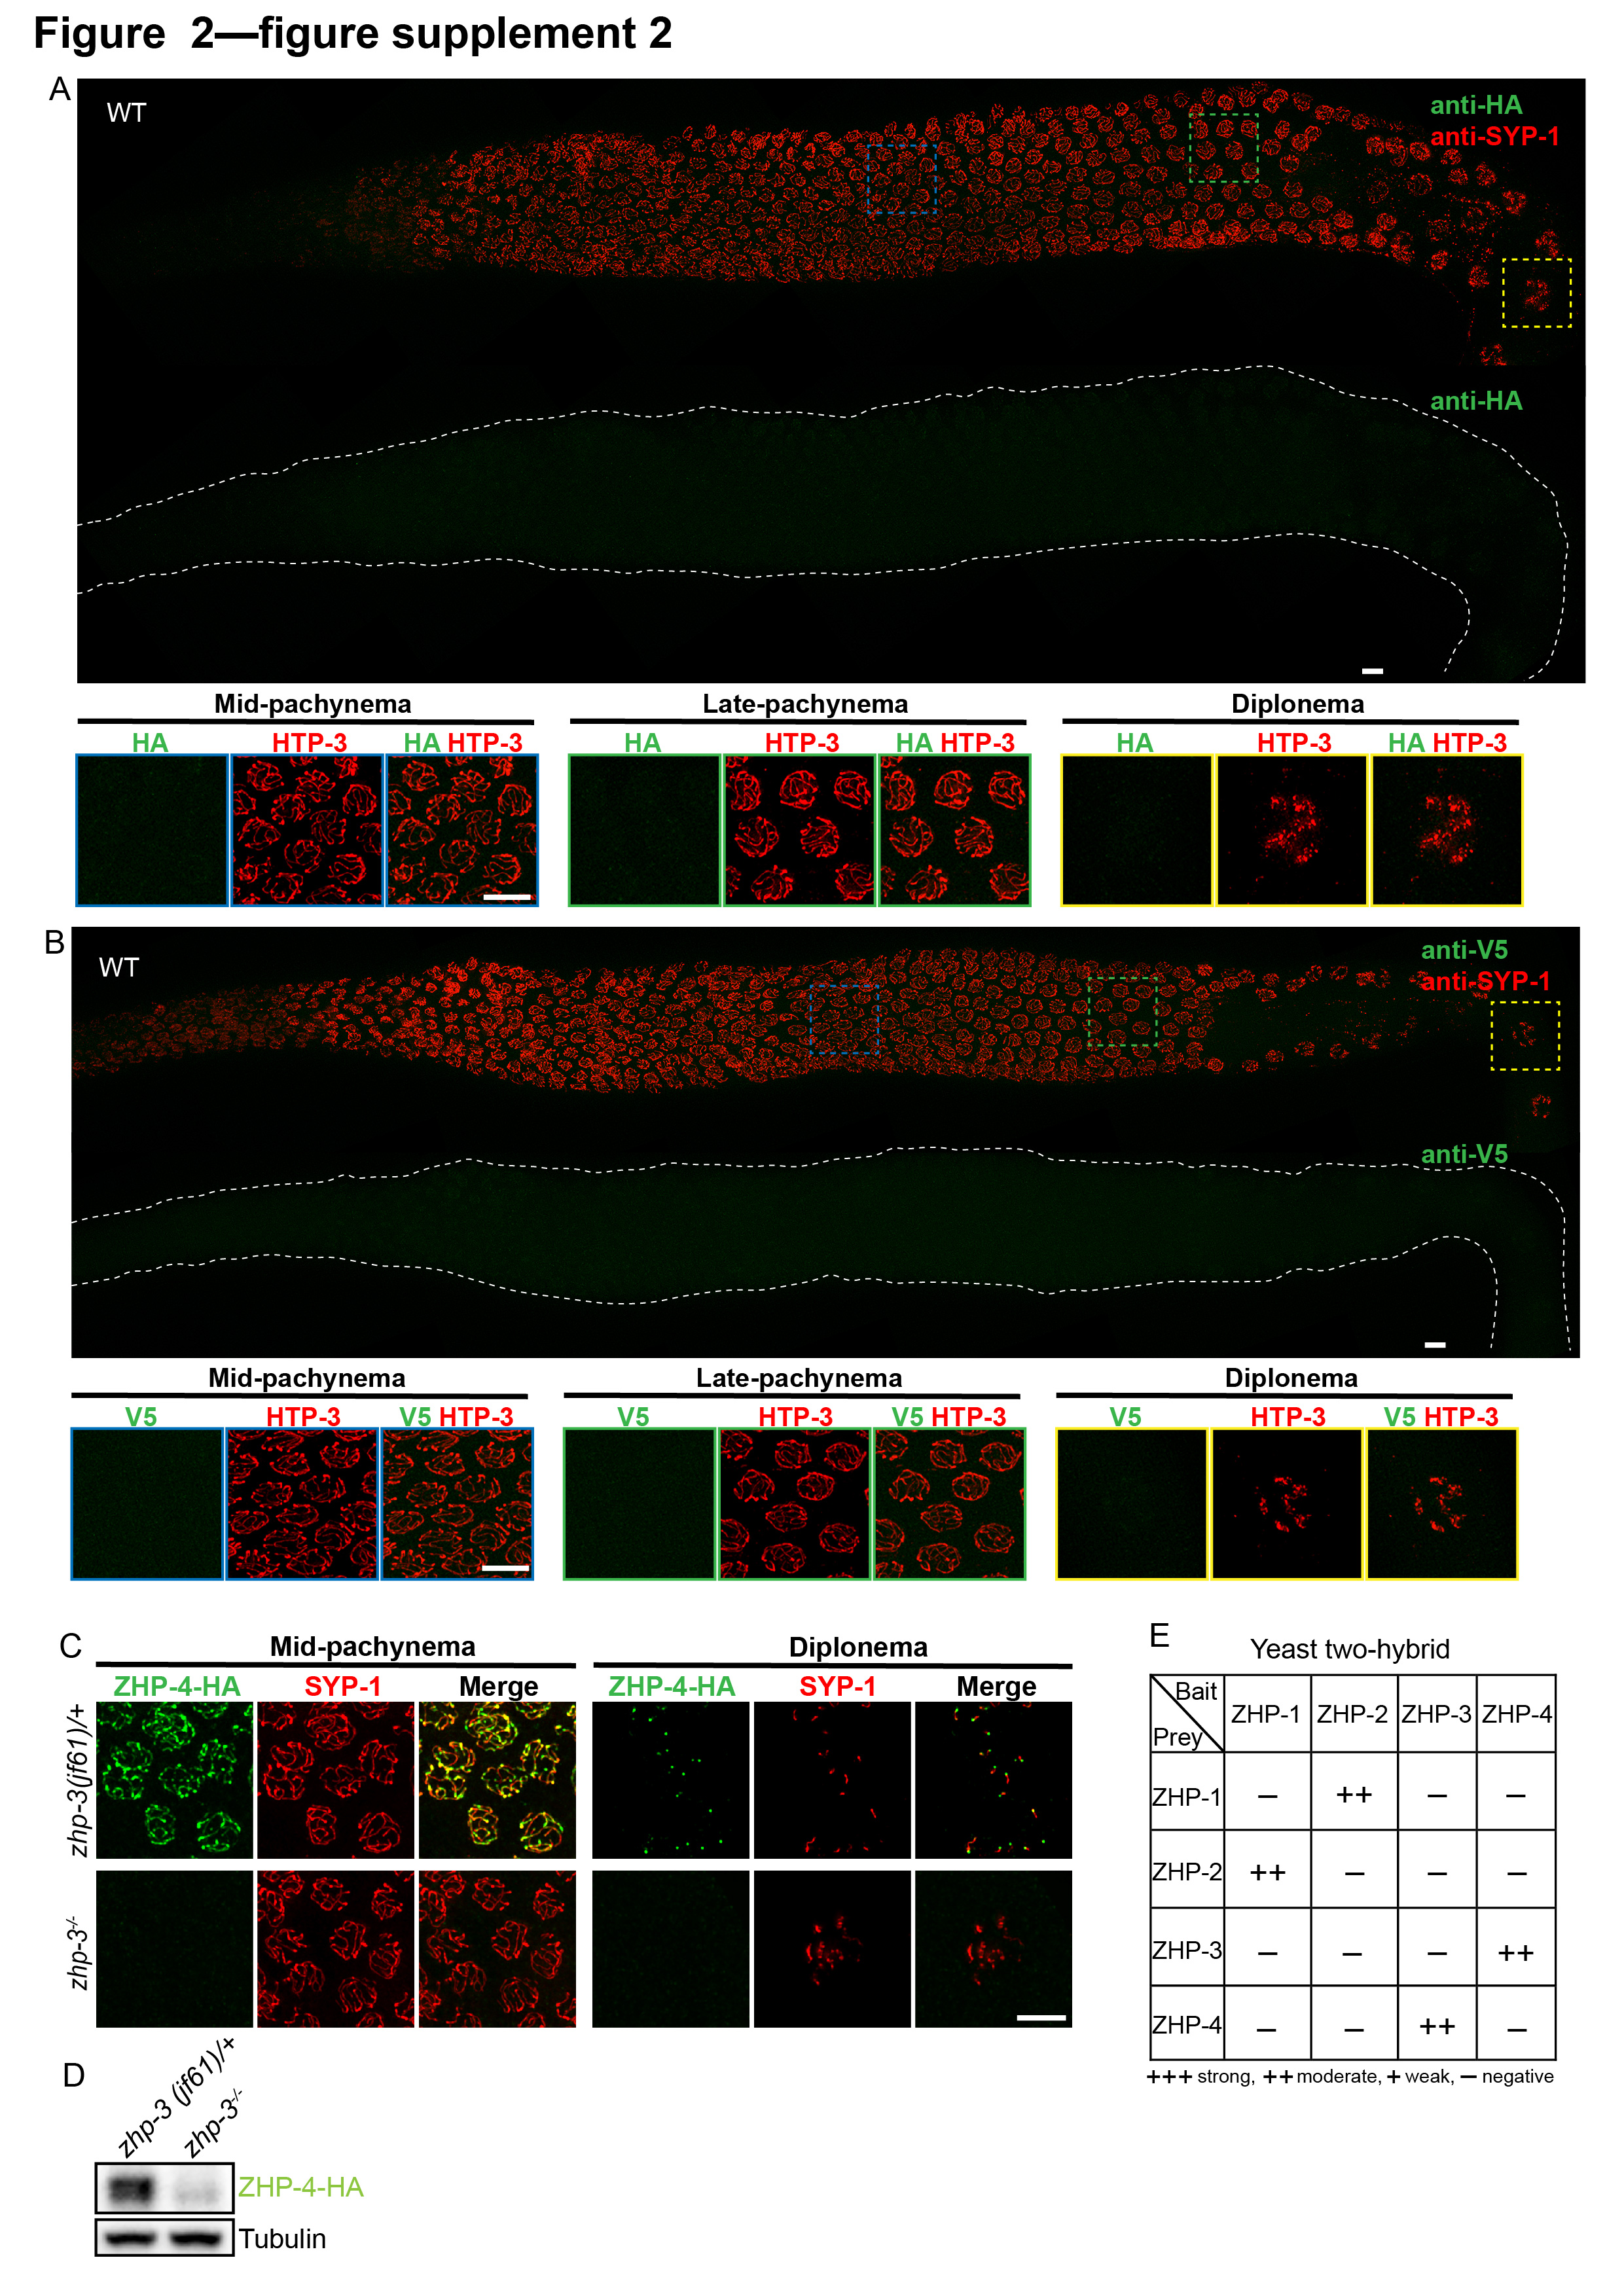

Supplement: supp [file elife-30789-supp-v1.zip › elife_poa_e30789_Figure_2_figure_supplement_2.jpg]

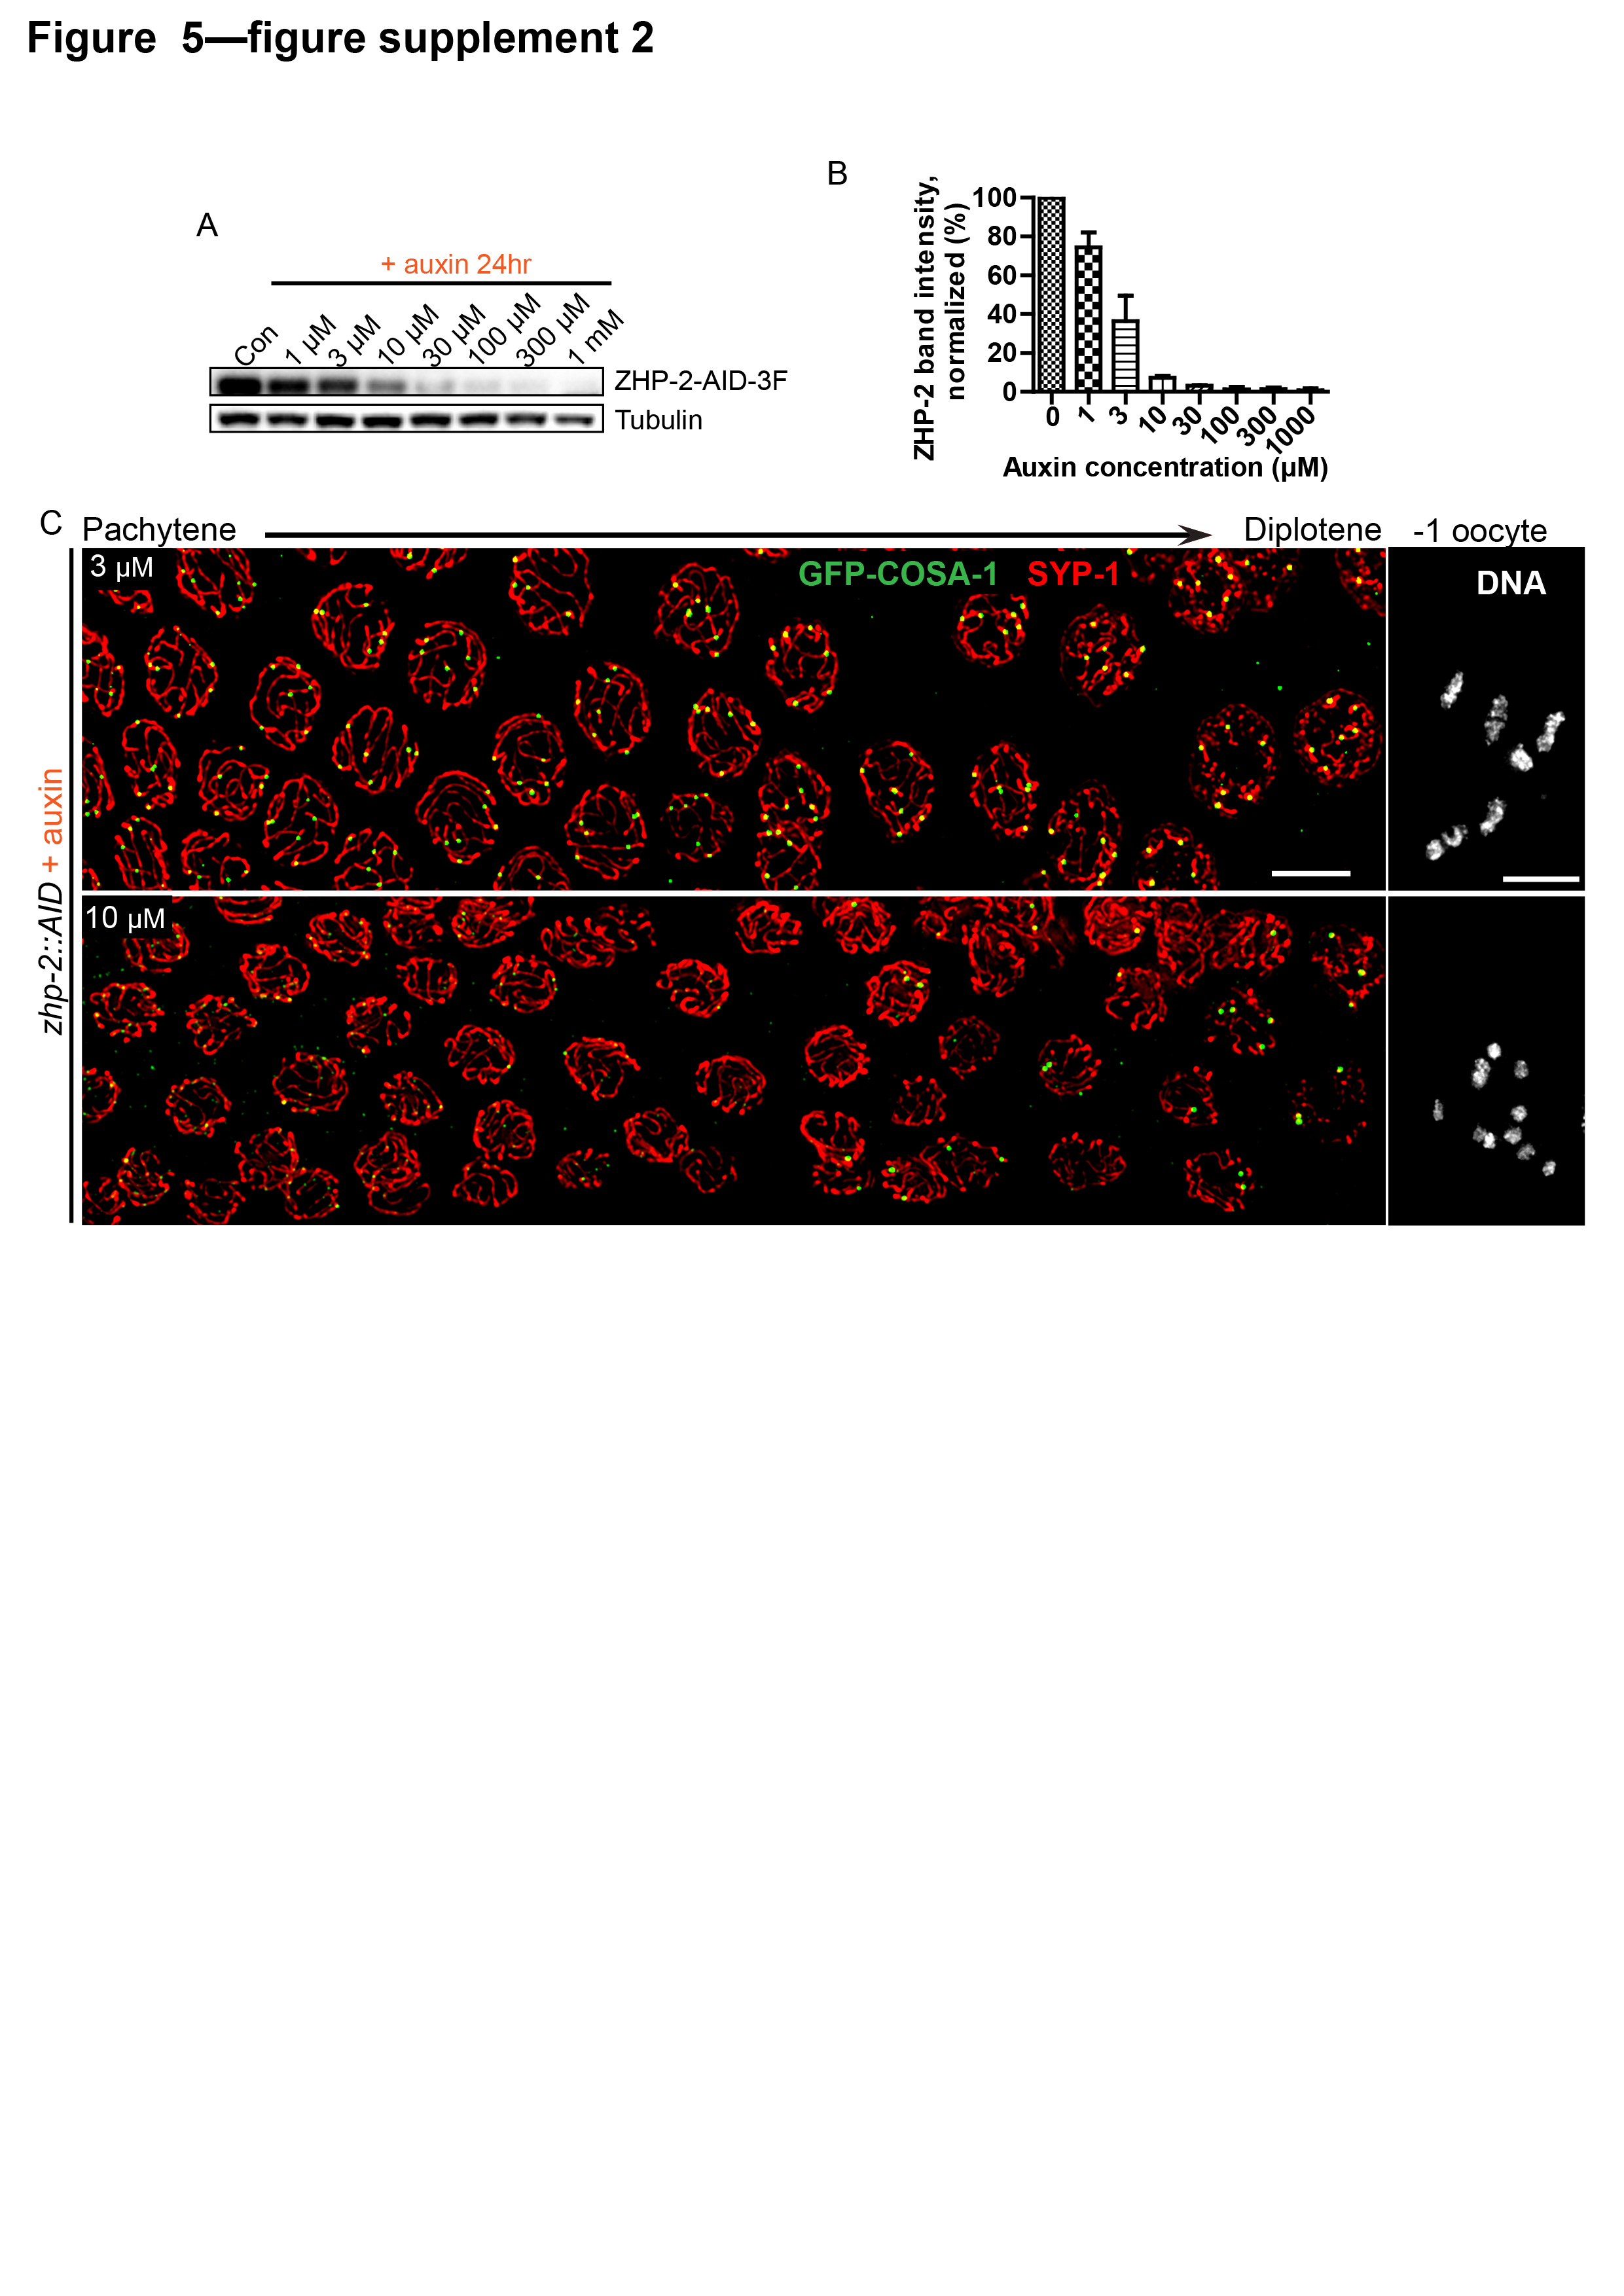

Supplement: supp [file elife-30789-supp-v1.zip › elife_poa_e30789_Figure_5_figure_supplement_2.jpg]

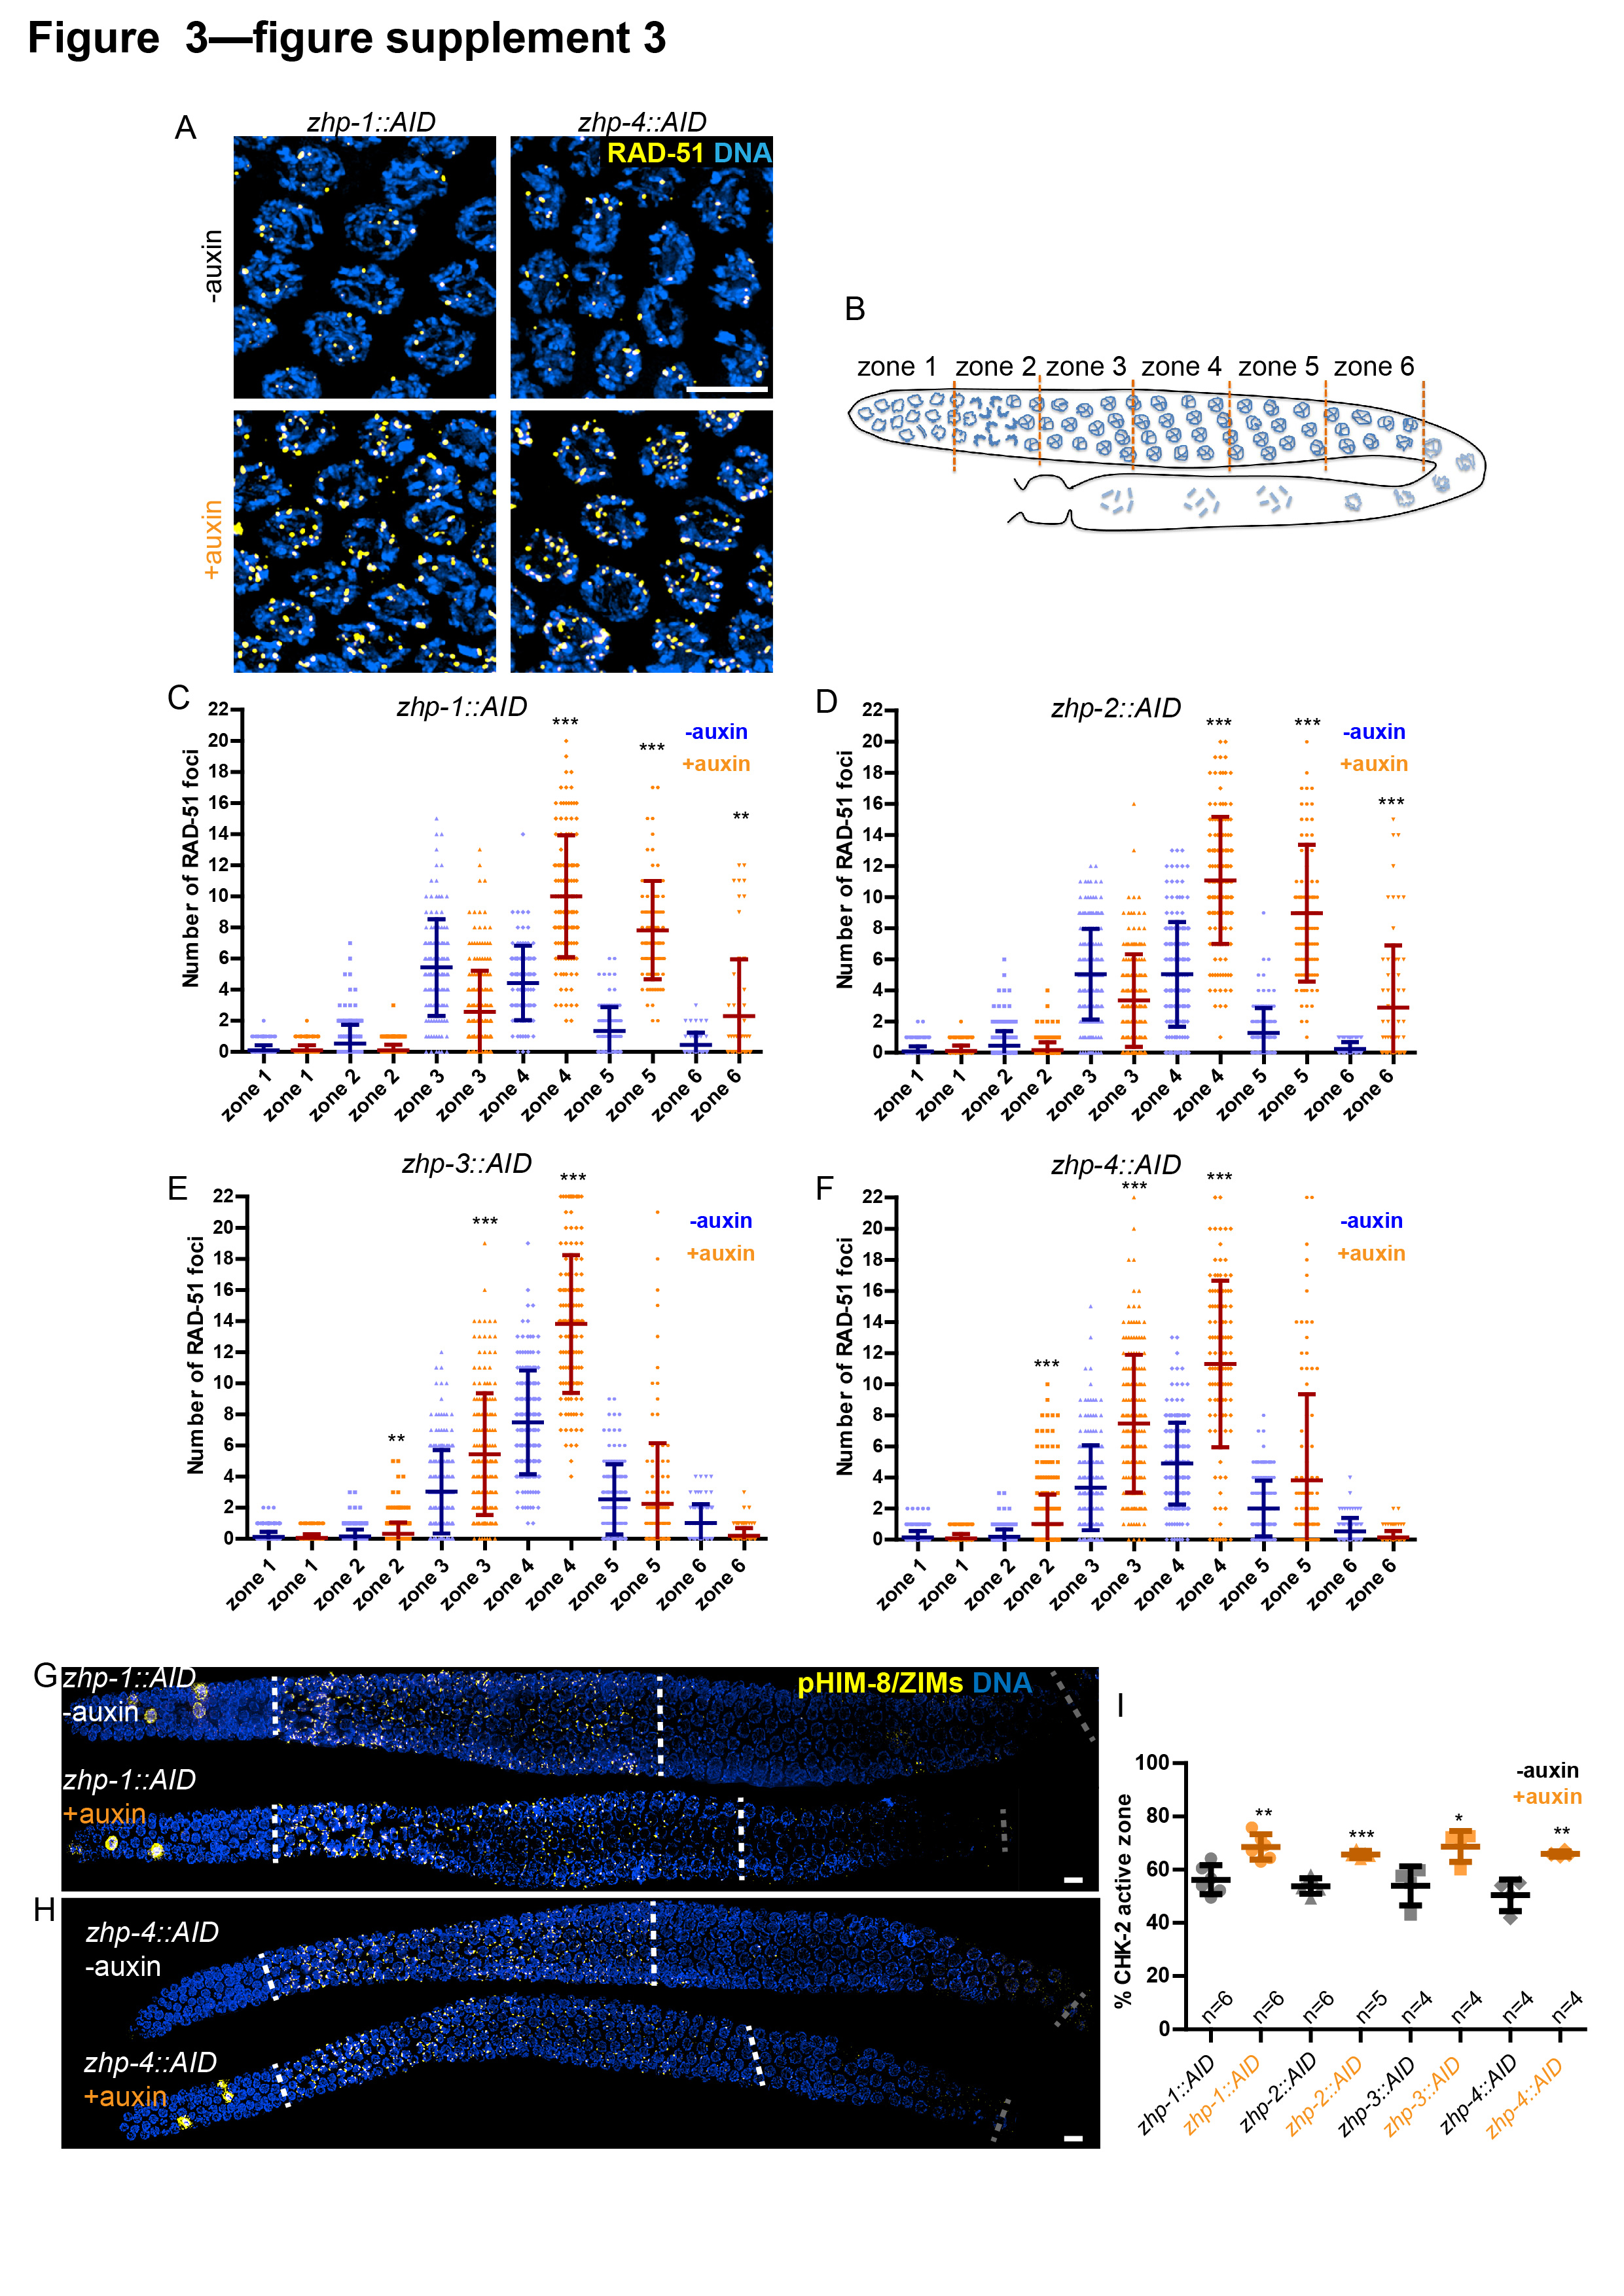

Supplement: supp [file elife-30789-supp-v1.zip › elife_poa_e30789_Figure_3_figure_supplement_3.jpg]

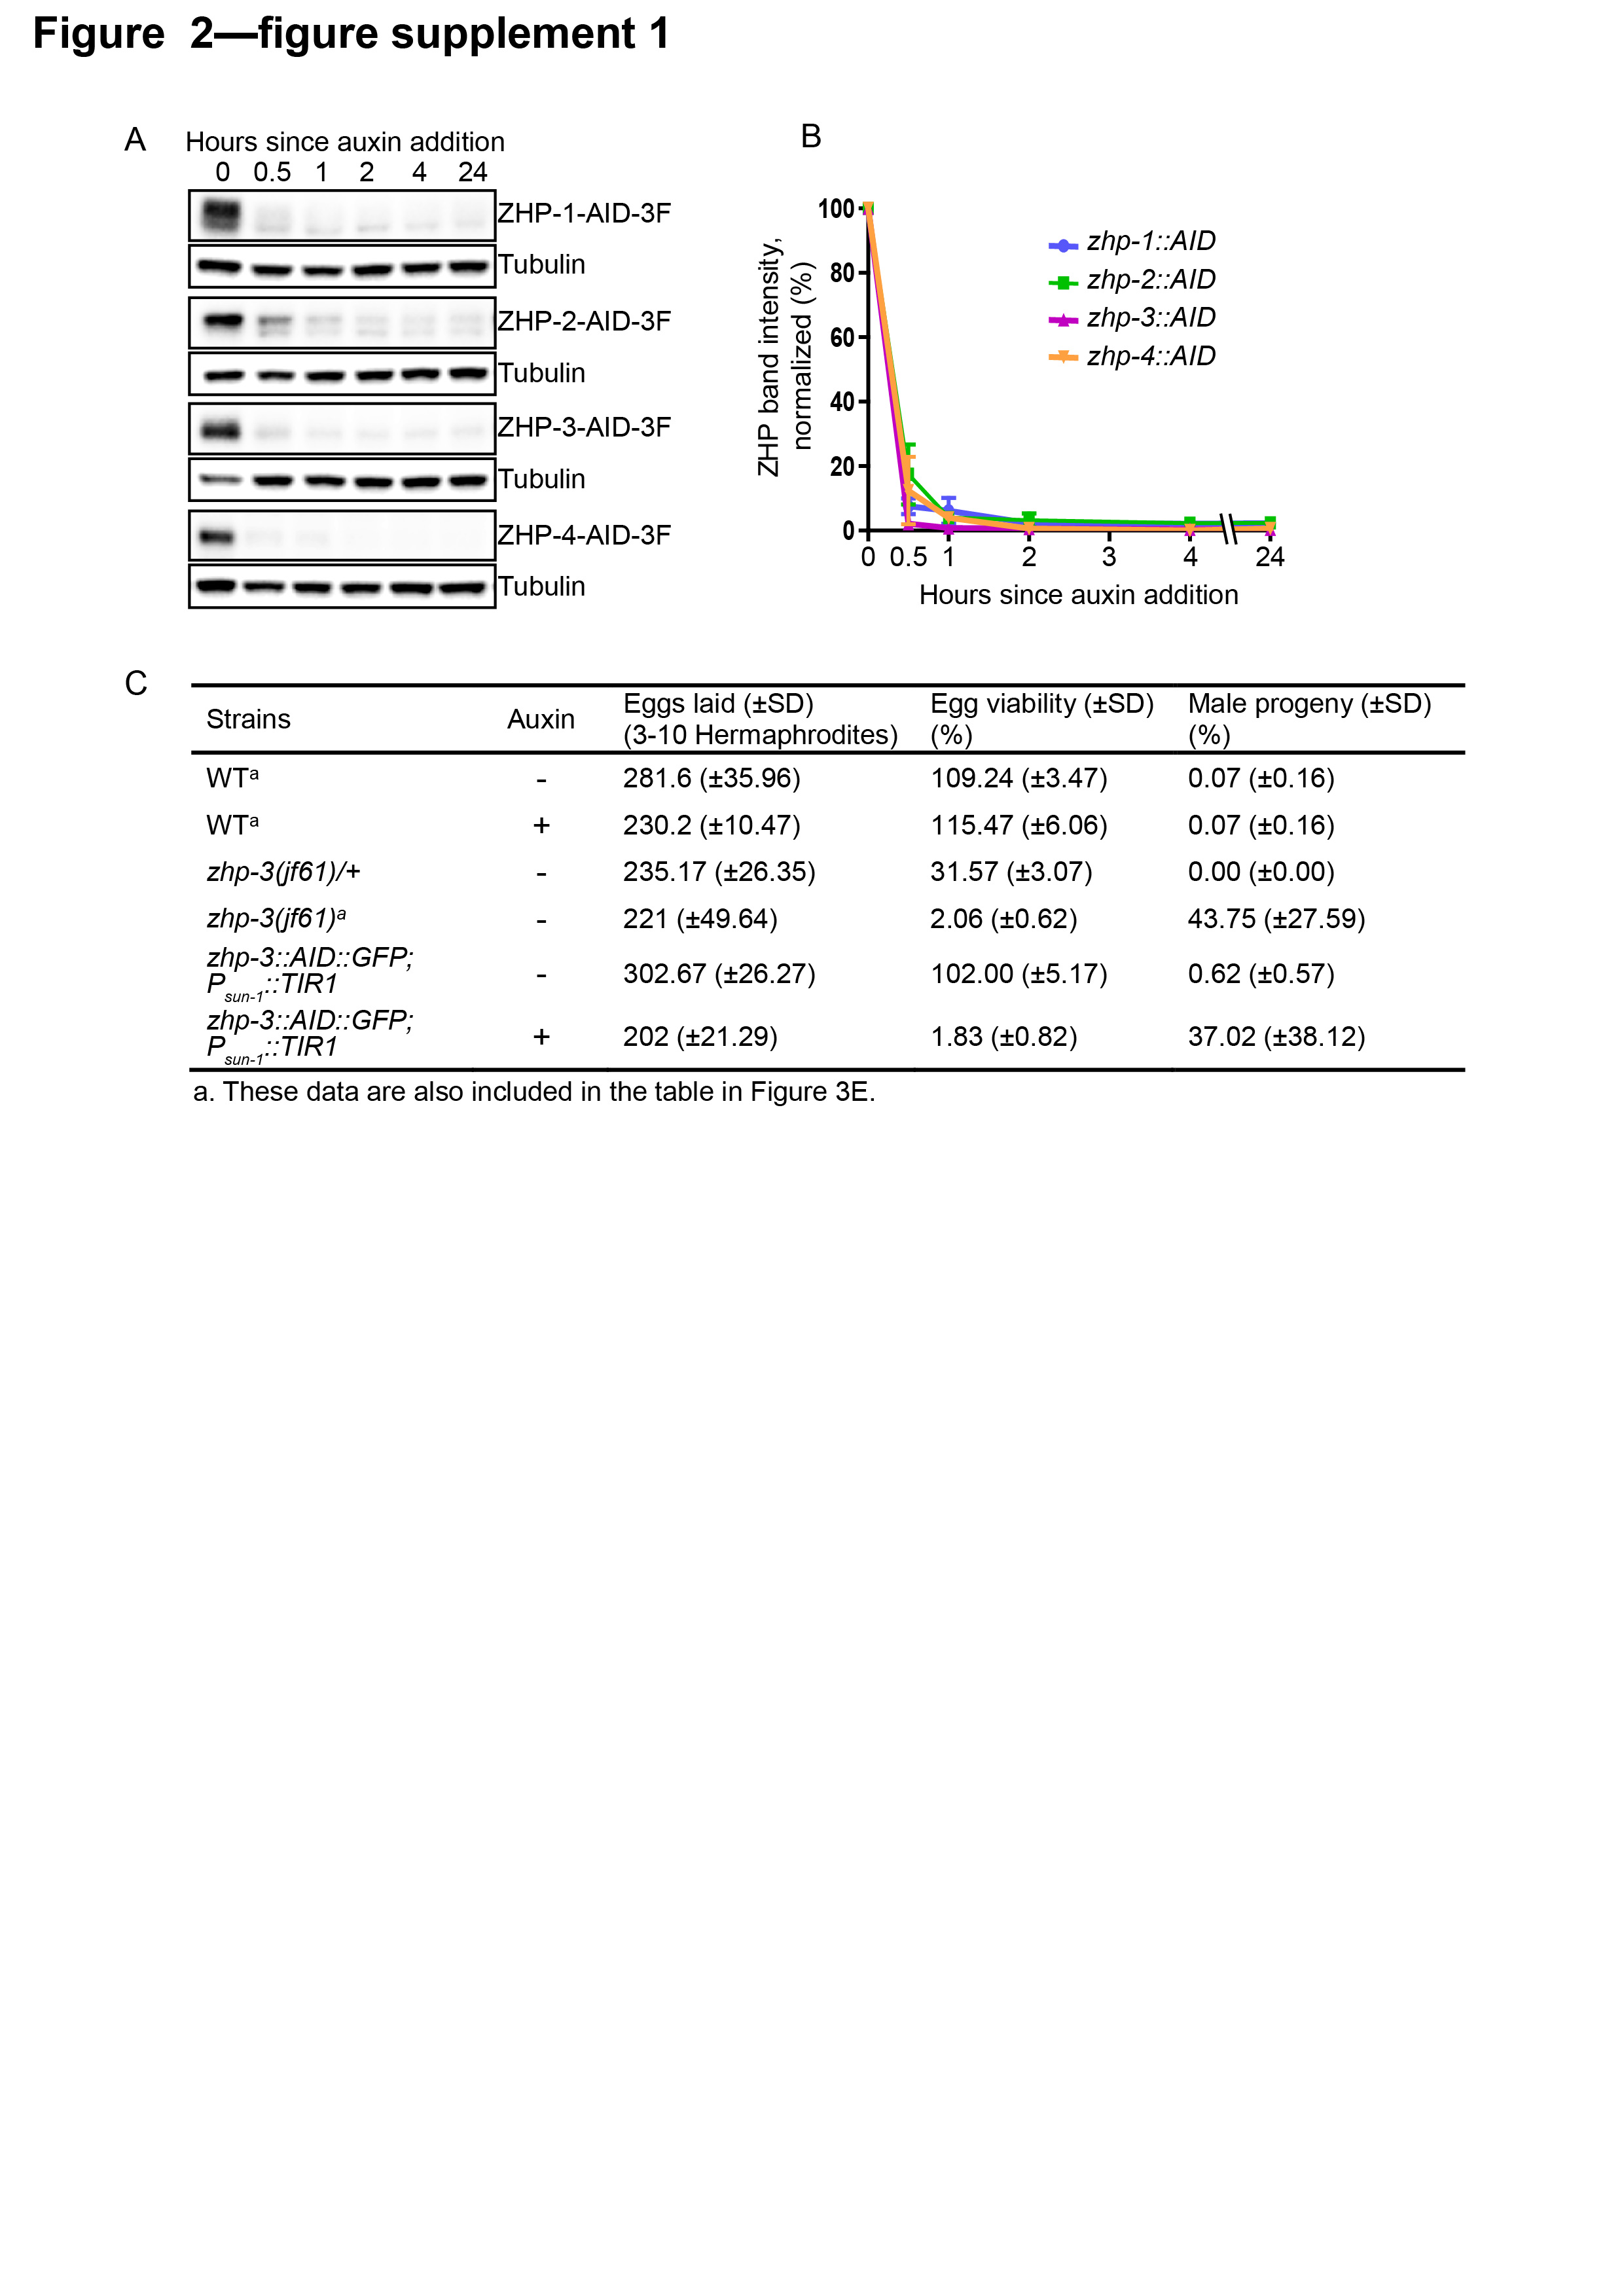

Supplement: supp [file elife-30789-supp-v1.zip › elife_poa_e30789_Figure_2_figure_supplement_1.jpg]

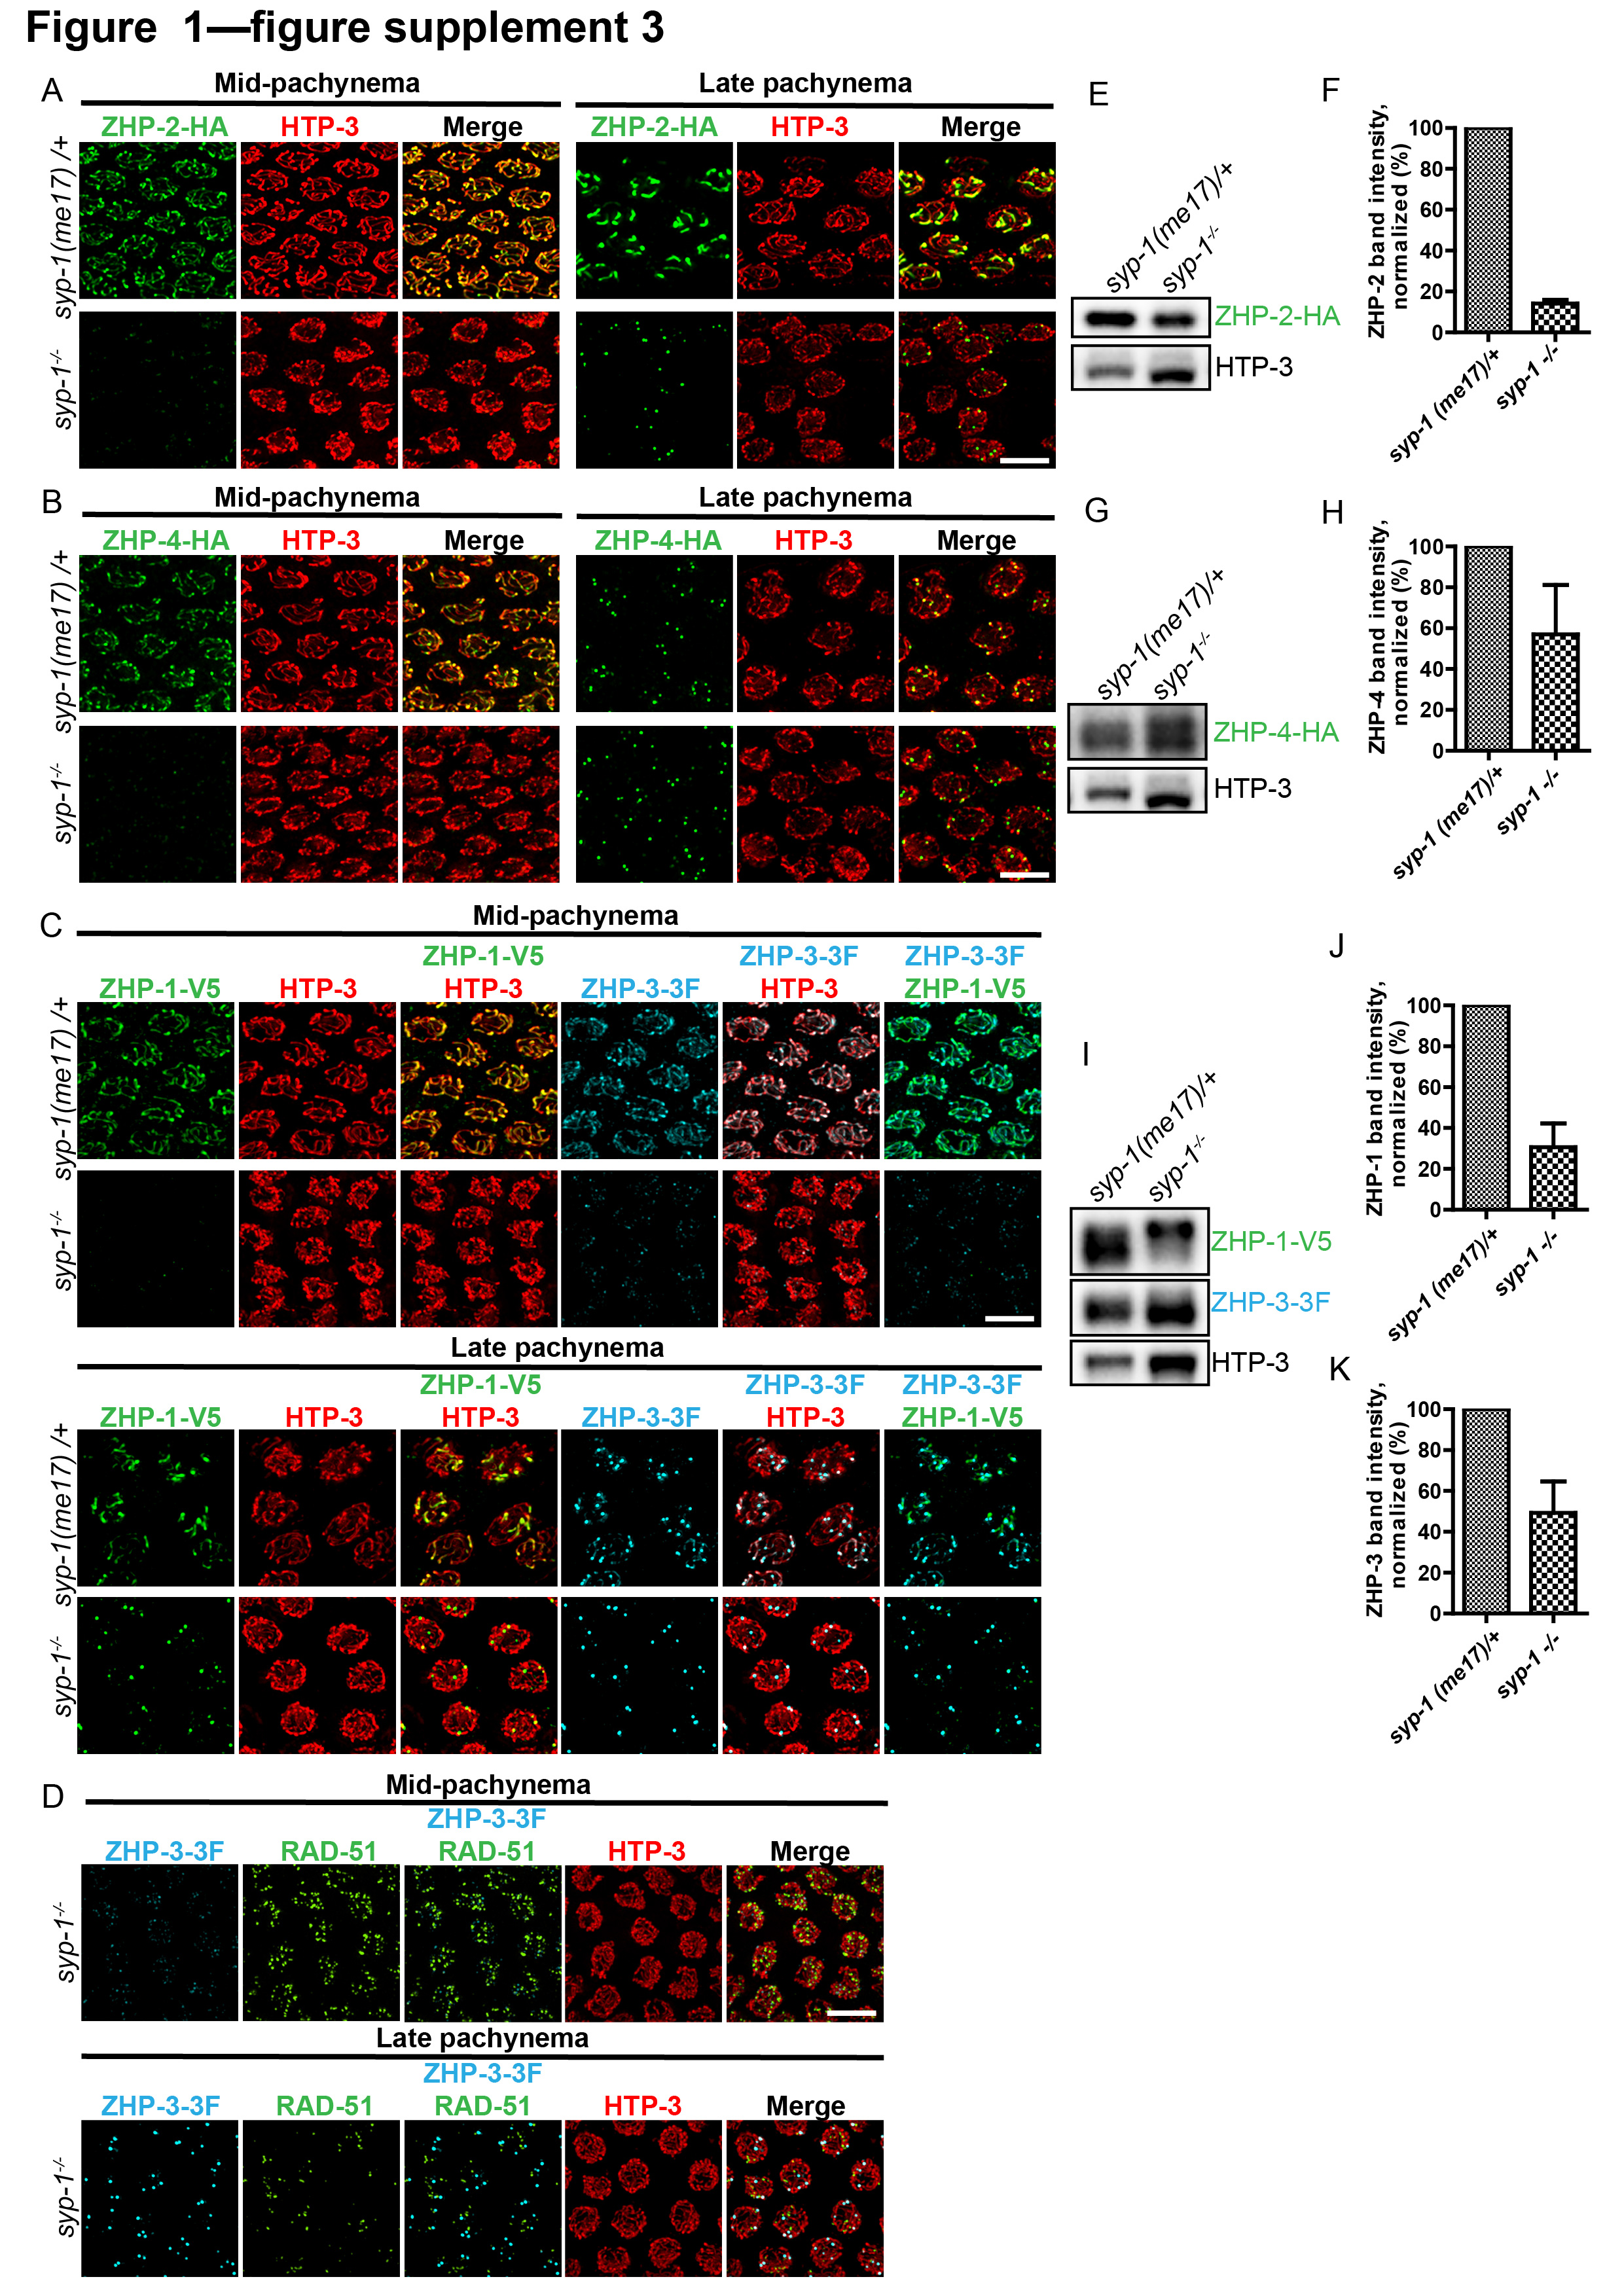

Supplement: supp [file elife-30789-supp-v1.zip › elife_poa_e30789_Figure_1_figure_supplement_3.jpg]

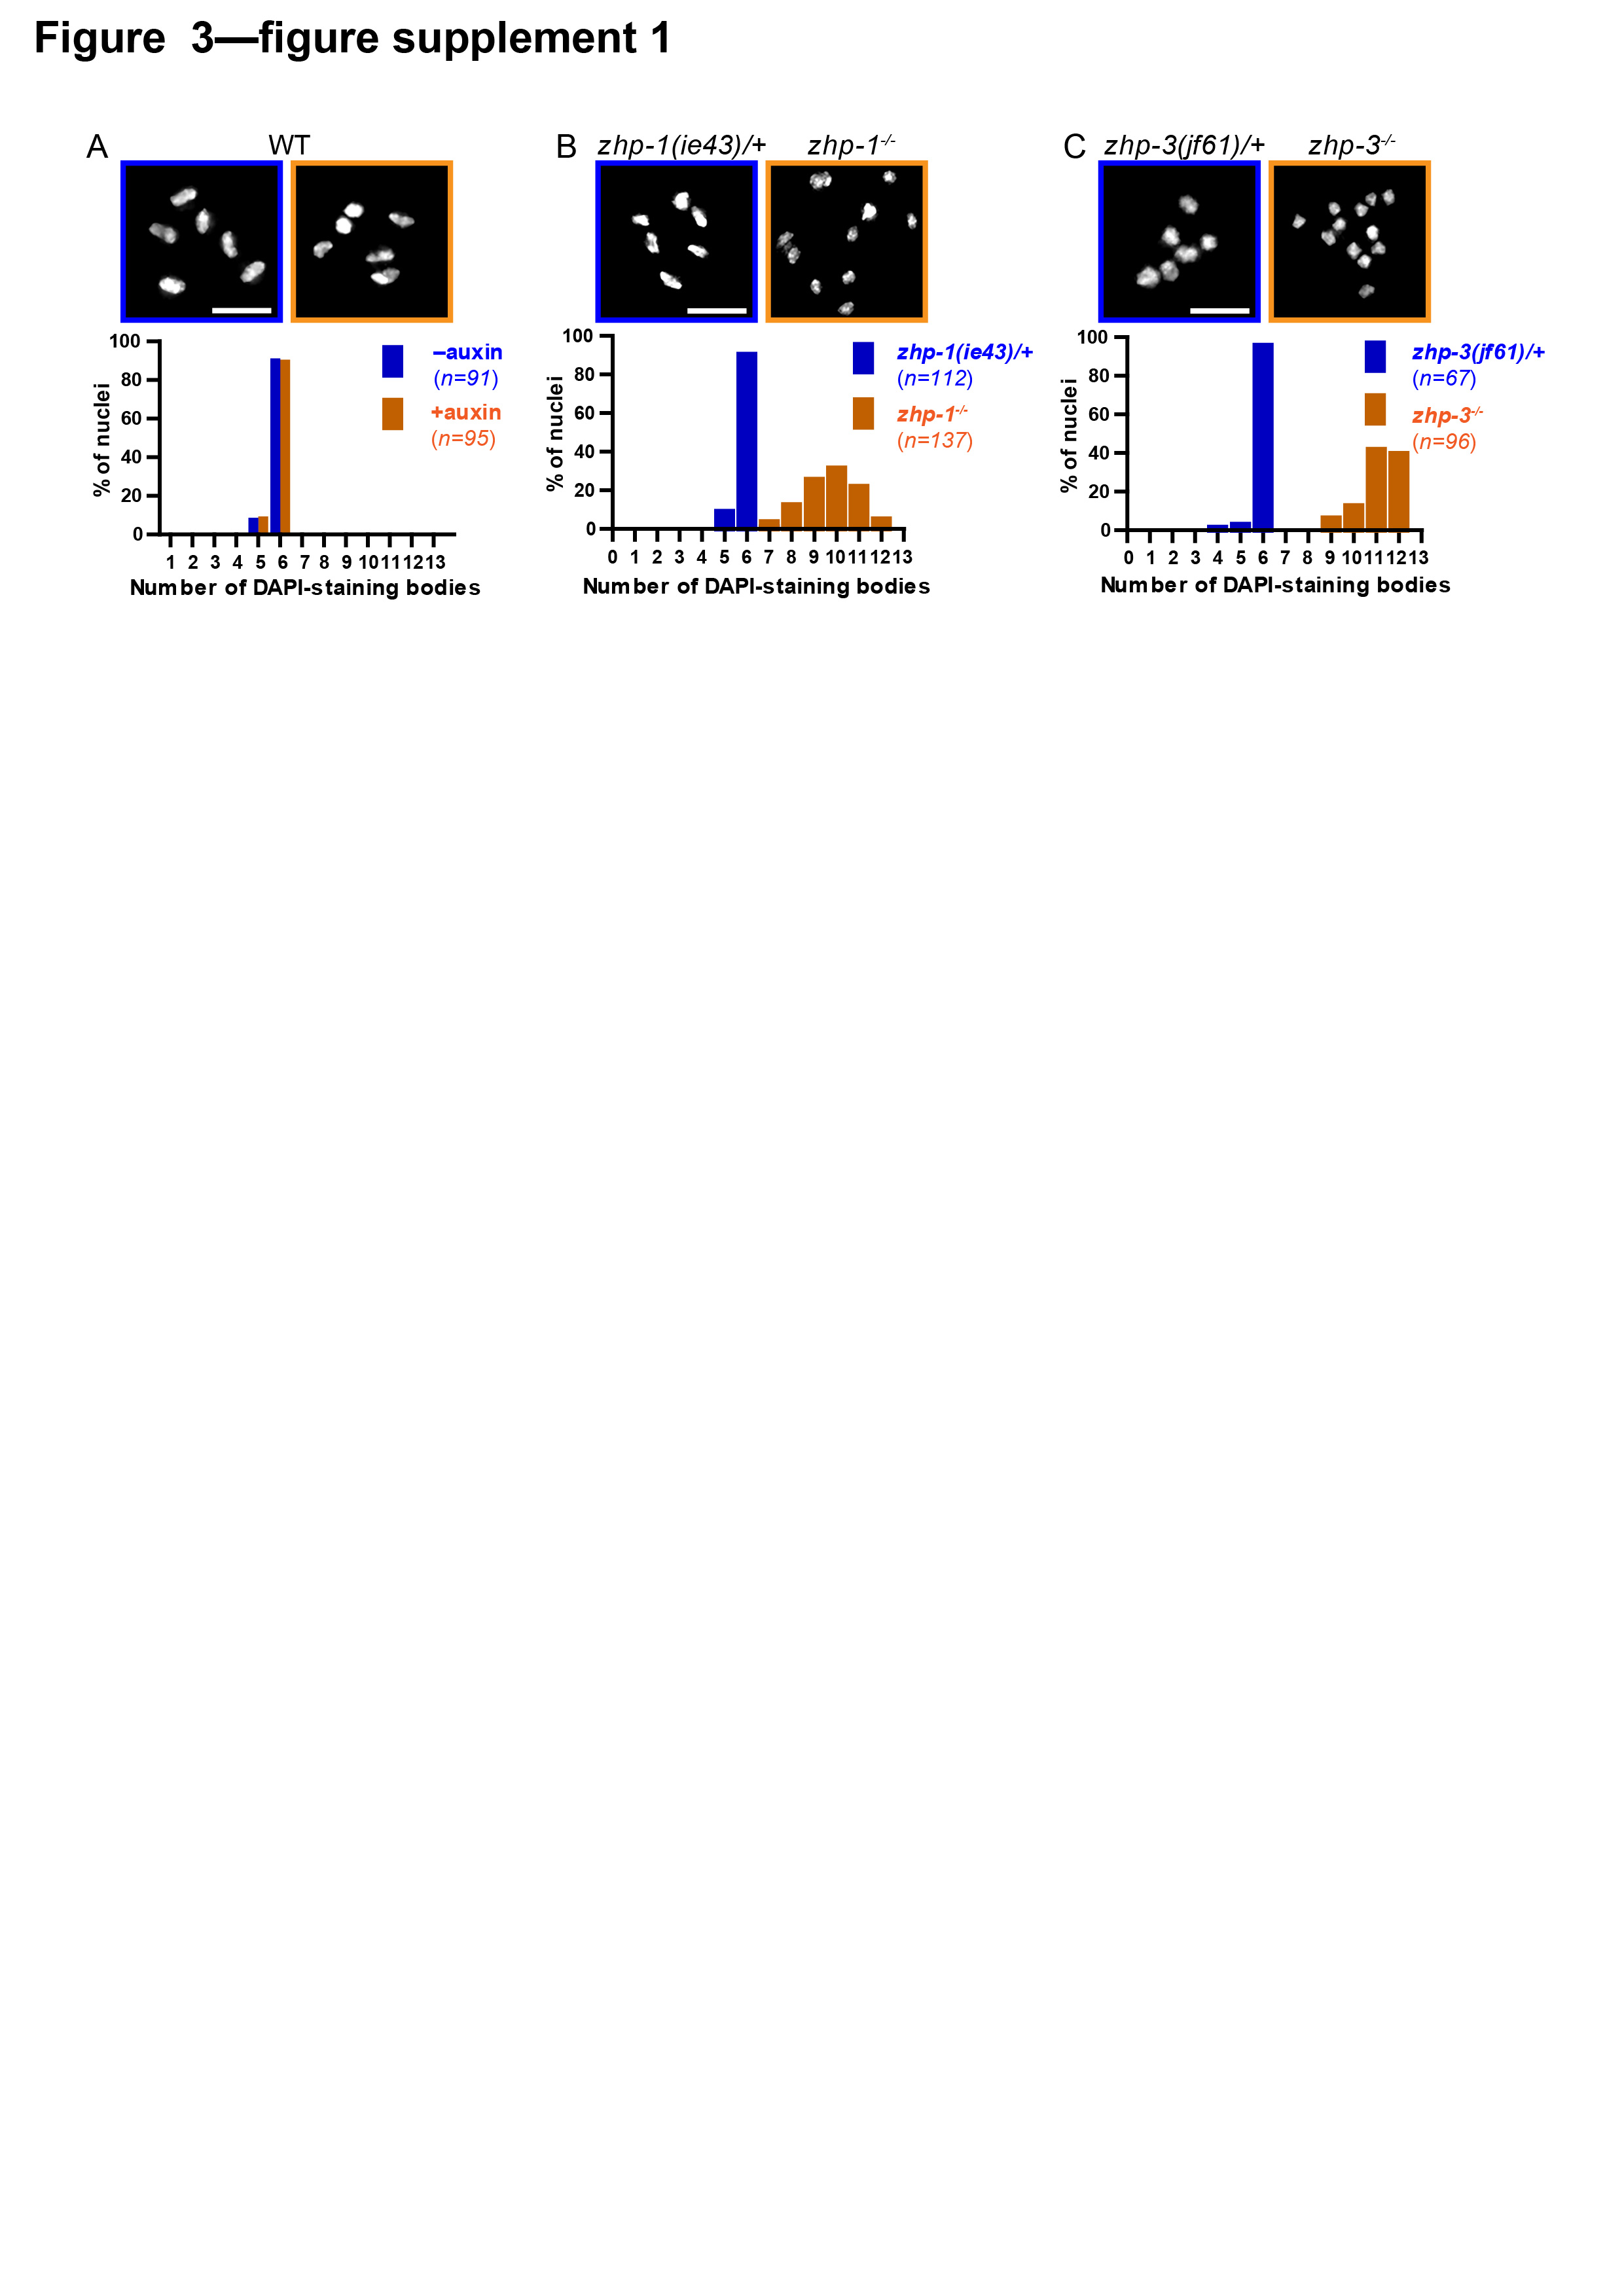

Supplement: supp [file elife-30789-supp-v1.zip › elife_poa_e30789_Figure_3_figure_supplement_1.jpg]

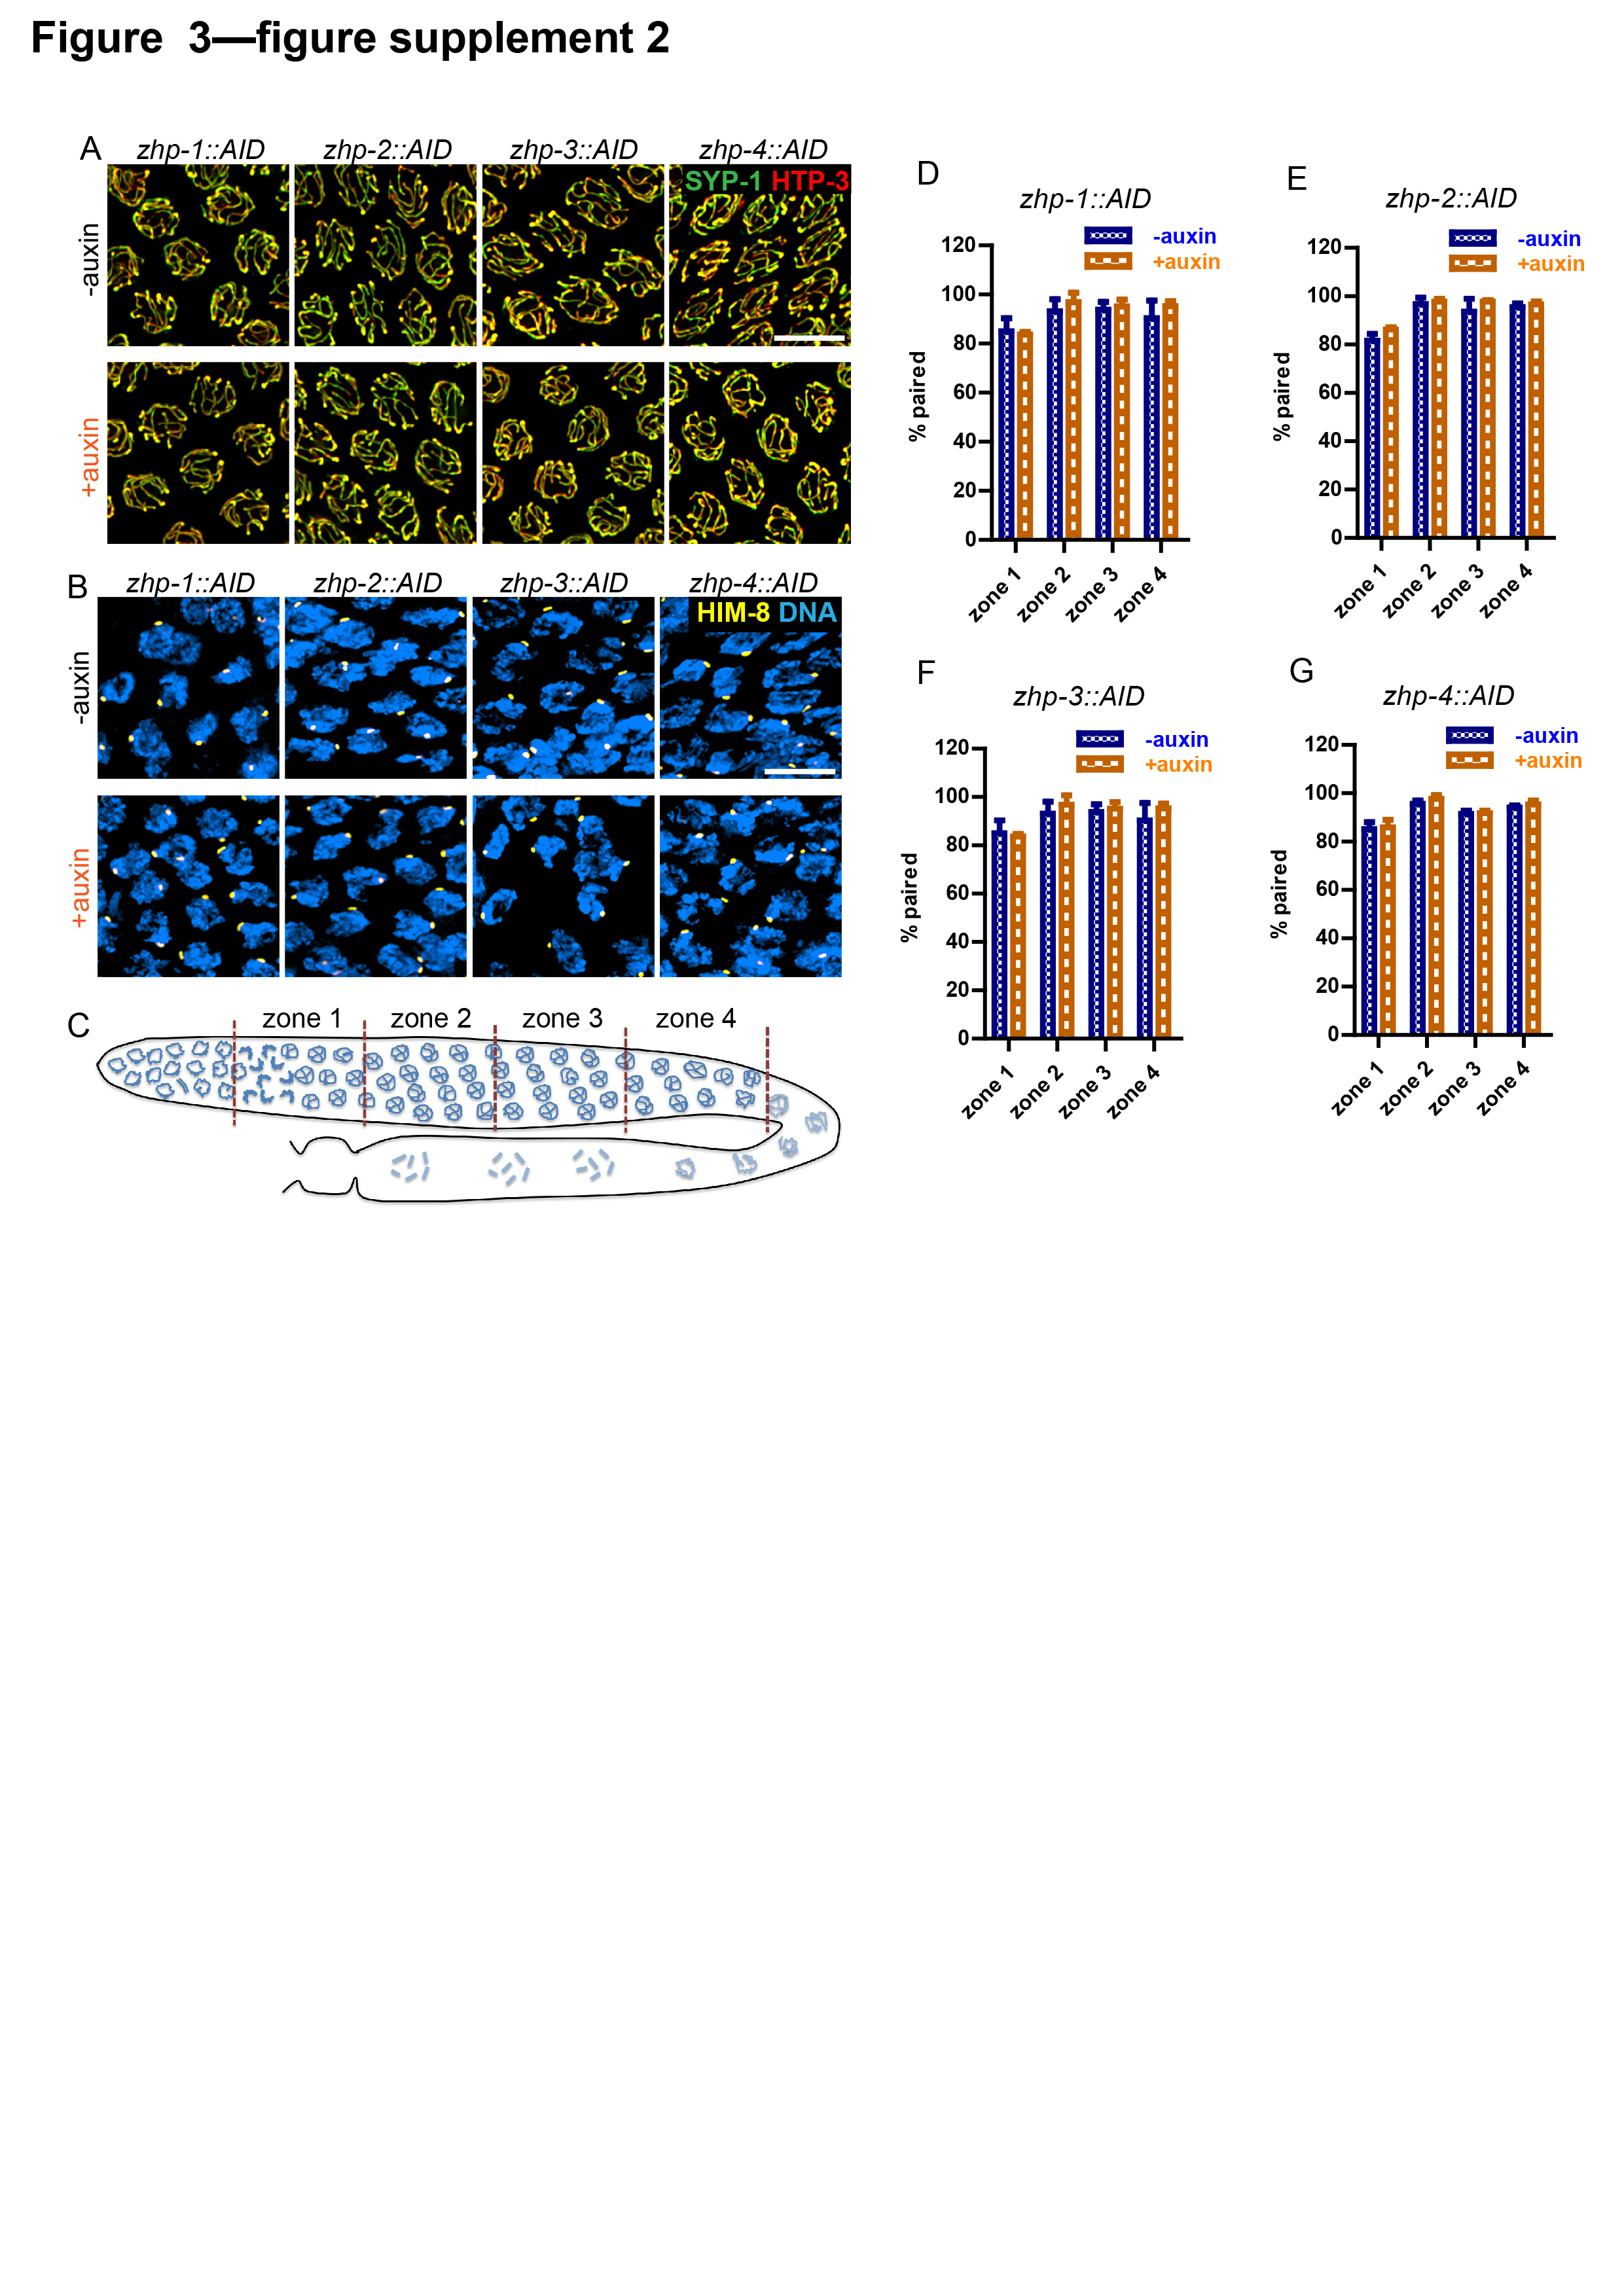

Supplement: supp [file elife-30789-supp-v1.zip › elife_poa_e30789_Figure_3_figure_supplement_2.jpg]

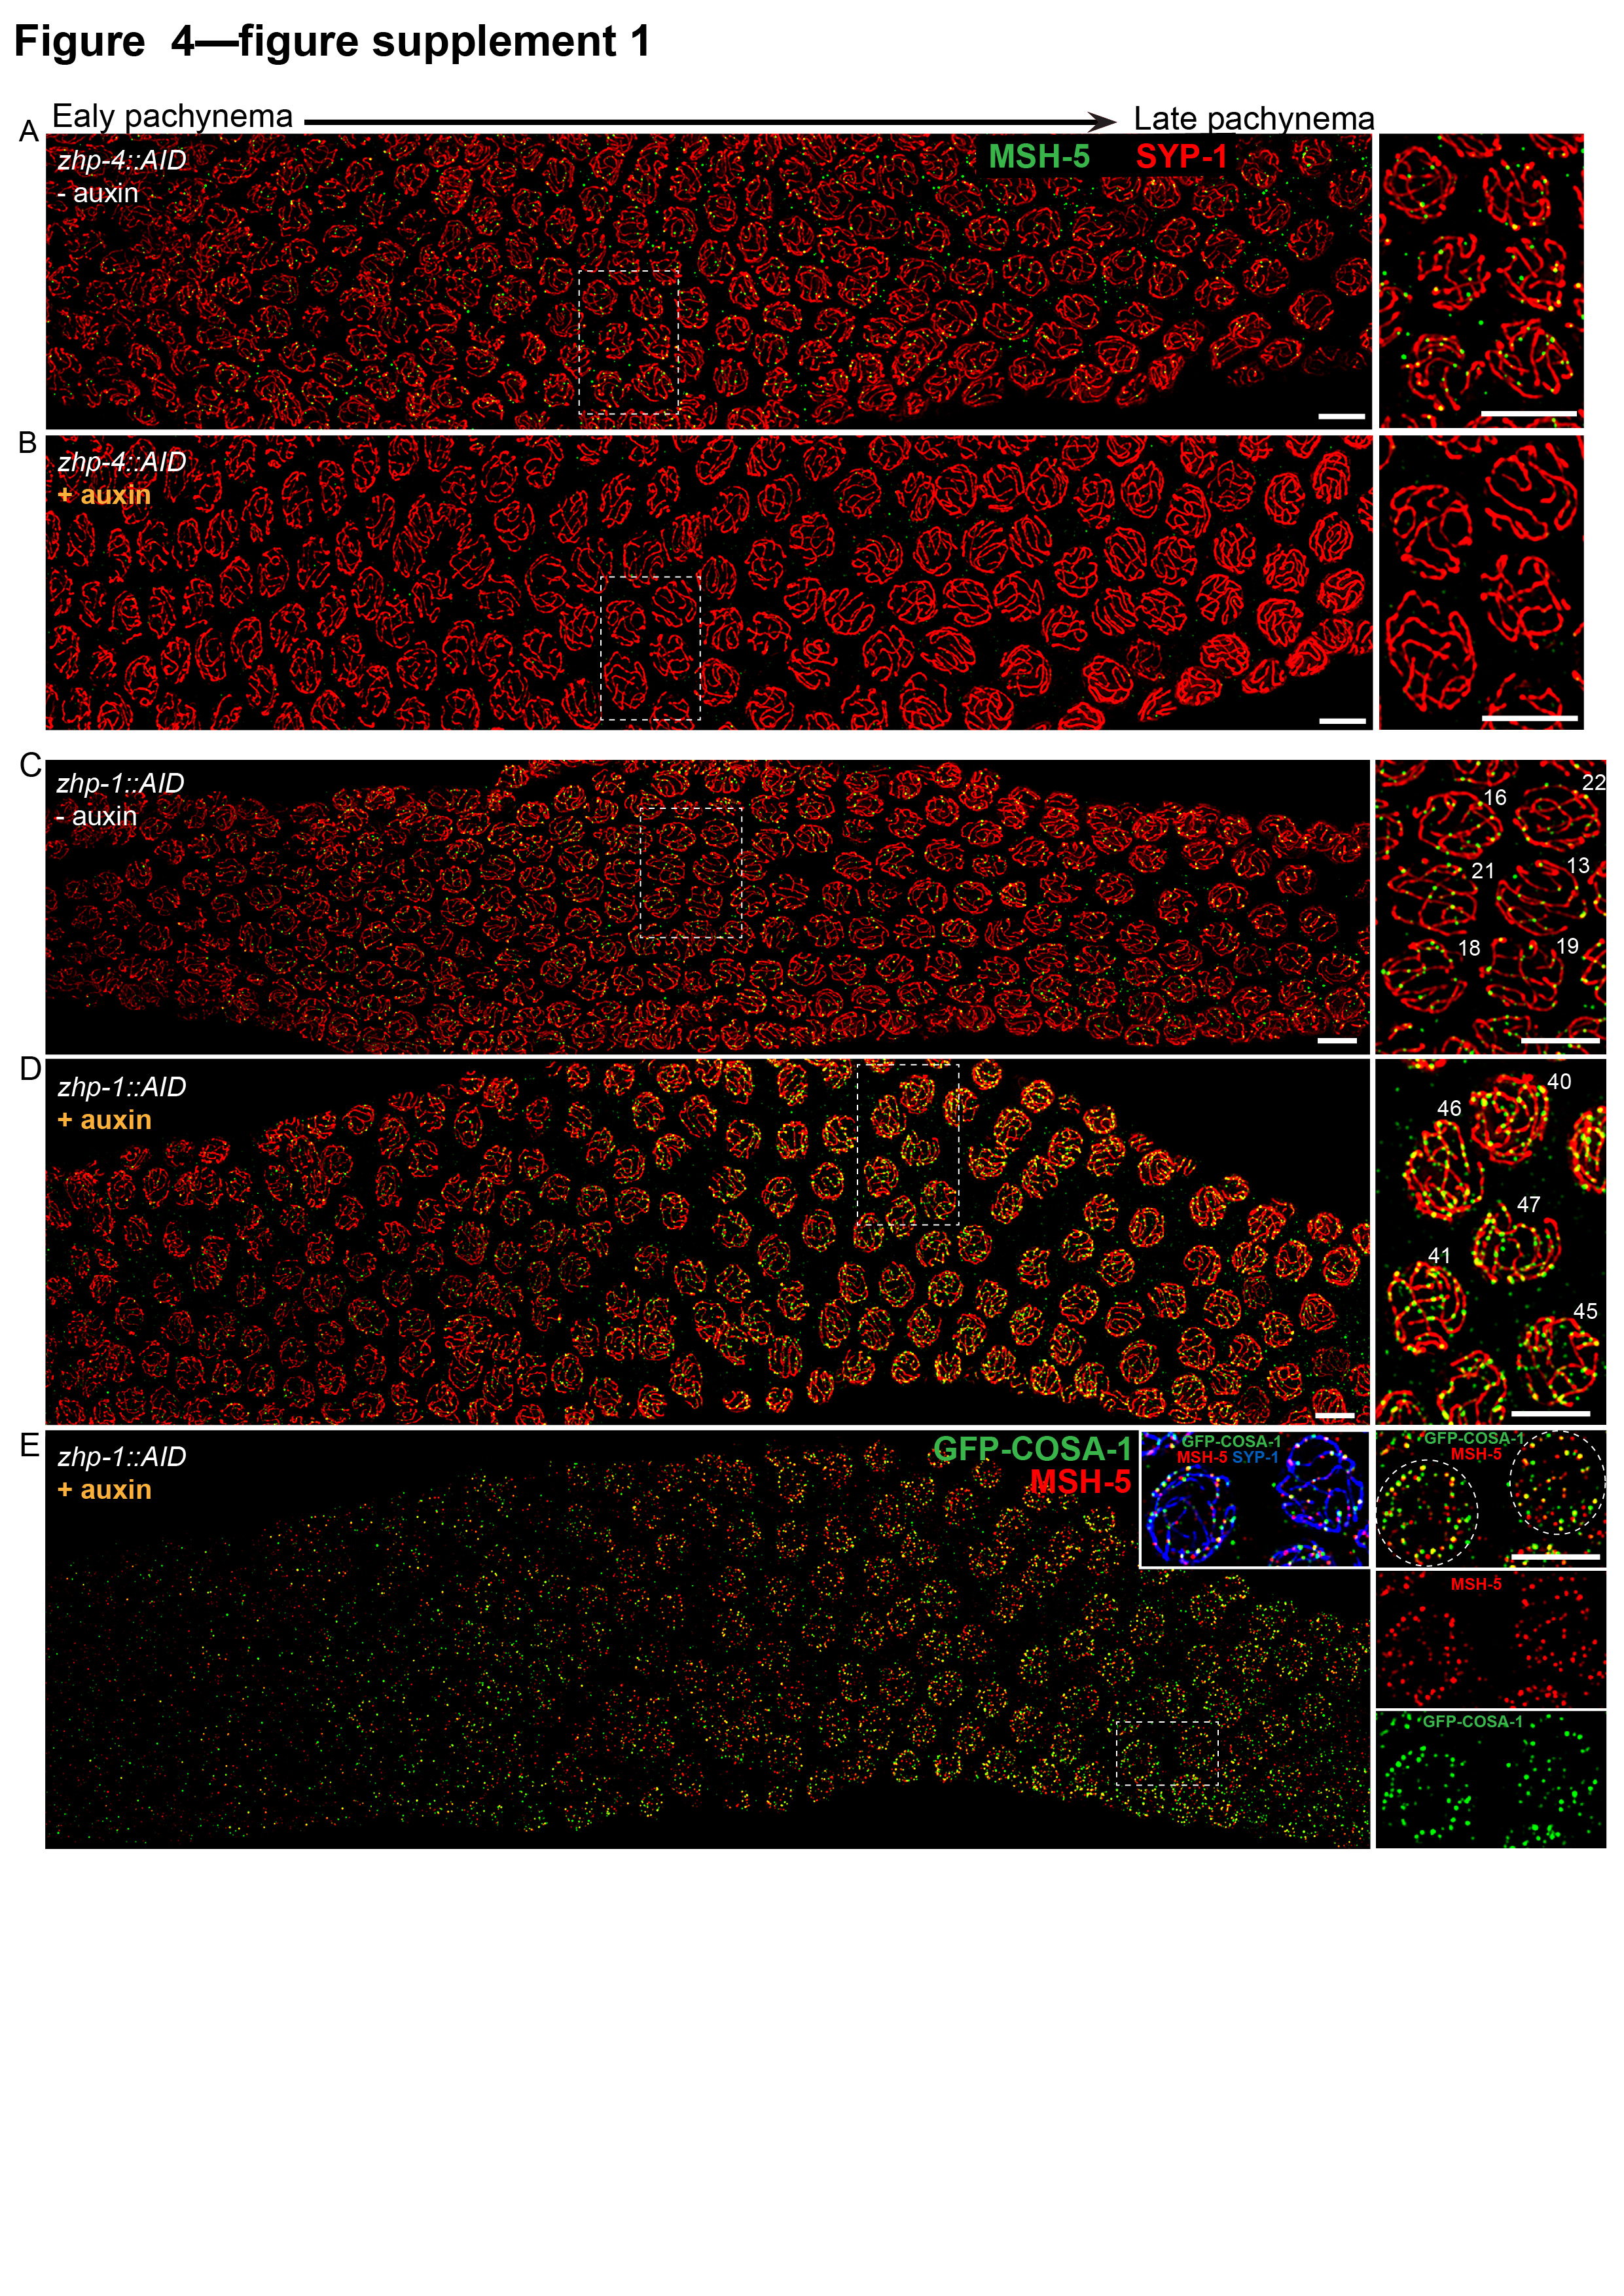

Supplement: supp [file elife-30789-supp-v1.zip › elife_poa_e30789_Figure_4_figure_supplement_1.jpg]
